# Supplementary material for: Stereoselective γ-lactam synthesis via palladium-catalysed intramolecular allylation
Source: Royal Society of Chemistry journal article supplement (doi:10.1039/b504731e), 2005-01-01
Supplement: b504731e.pdf [file b504731e.pdf]

## Stereoselective $\gamma$ -Lactam Synthesis via Palladium-catalysed Intramolecular Allylation

Donald Craig,<sup>a</sup> Christopher J. T. Hyland<sup>a</sup> and Simon E. Ward<sup>b</sup>

<sup>a</sup> Department of Chemistry, Imperial College London, South Kensington Campus, London SW7 2AZ, U.K.

<sup>b</sup> GlaxoSmithKline Research Ltd, New Frontiers Science Park North, Third Avenue, Harlow, Essex CM19 5AW, U.K.

### Experimental procedures and spectroscopic data/physical characteristics of all compounds prepared in this work

#### ***N*-(Toluene-4-sulfonyl)-L-serine**

To a rapidly-stirred solution of L-serine (18.0 g, 171 mol, 1.0 equiv) and TsCl (43.2 g, 227 mol, 1.3 equiv) in EtOAc (400 ml) and H<sub>2</sub>O (120 ml) was added NaOH (228 ml of a 2 M aqueous solution, 456 mmol, 2.7 equiv) dropwise over 3 h. After a further 1 h the phases were separated and the aqueous layer acidified with *c*.HCl (25 ml). The resulting white precipitate was filtered and dried azeotropically with toluene to yield *N*-(toluene-4-sulfonyl)-L-serine (26.2 g, 79%) as a colourless solid; mp 236 °C (EtOAc); *R<sub>f</sub>* 0.32 (50% EtOAc–petrol);  $\delta_{\text{H}}$  (300 MHz) 7.94 (1H, d, *J* 8.5 Hz, NH), 7.68 (2H, d, *J* 8.5 Hz, *ortho* Ts), 7.36 (2H, d, *J* 8.5 Hz, *meta* Ts), 3.75-3.68 (1H, m, CHNHTs), 3.53-3.49 (2H, m, CH<sub>2</sub>OH), 2.50 (1H, s, CH<sub>2</sub>OH), 2.37 (3H, s, Me of Ts); *m/z* (CI) 277 [M+NH<sub>4</sub>]<sup>+</sup>.  
*In agreement with published data.*<sup>1</sup>

#### **(+)-(S)-3-hydroxy-1-(4-methoxyphenyl)-2-(toluene-4-sulfonamido)propan-1-one**

Activated magnesium turnings (15.4 g, 632 mmol, 4.1 equiv) were suspended in THF (400 ml) and 4-bromoanisole (77.2 ml, 616 mmol, 4.0 equiv) added dropwise to maintain a steady reflux. After stirring for 1 h the mixture was transferred to a solution of acid **170** (40.0 g, 154 mmol, 1.0 equiv), and *n*-BuLi (193 ml of a 1.6 M solution in hexanes, 308 mmol, 2.0 equiv) in THF (400 ml) at –78 °C. The mixture was allowed to warm to rt and after 37 h the reaction mixture was poured into HCl (1 M; 400 ml) and extracted with Teac (3 x 400 ml). The combined organic extracts were washed with saturated aqueous NaHCO<sub>3</sub> (600 ml) and dried (MgSO<sub>4</sub>). Concentration under reduced pressure and recrystallisation (EtOAc–petrol) gave the *ketone* (39.0 g, 73%) as an off-white solid; mp 80–82 °C (EtOH); *R<sub>f</sub>* 0.25 (10% EtOAc–CH<sub>2</sub>Cl<sub>2</sub>);  $[\alpha]_{\text{D}}^{20}$  +84.0 (*c* 1.0, EtOH);  $\nu_{\text{max}}$  (film) 3489, 3283, 3264, 1680, 1601, 1336, 1308, 1165, 910, 739 cm<sup>-1</sup>;  $\delta_{\text{H}}$  (300 MHz), 7.80 (2H, d, *J* 9.0 Hz, *ortho* ArOMe), 7.73 (2H, d, *J* 8.0 Hz, *ortho* Ts), 7.21 (2H, d, *J* 8.0 Hz, *meta* Ts), 6.93 (2H, d, *J* 9.0 Hz, *meta* ArOMe), 6.11 (1H, d, *J* 7.5 Hz, NHTs), 4.90-4.85 (1H, m, CHNHTs), 4.10-3.90 (1H, m, CHHOH), 3.88 (3H, s, ArOMe), 3.78-3.73 (1H, m, CHHOH), 2.34 (3H, s, Me of Ts);  $\delta_{\text{C}}$  (75 MHz) 202.2 (C=O), [164.5, 144.0, 136.5 (q Ar)], [131.1, 129.8, 127.1 (ArH)], 126.5 (q Ar), 114.2 (ArH),

64.7 (CH<sub>2</sub>OH), 59.6 and 55.7 (CHNHTs and OMe of ArOMe), 21.8 (Me of Ts); *m/z* (CI) 367 [M+NH<sub>4</sub>]<sup>+</sup>, 350 [M+H]<sup>+</sup> (Found: C, 58.49; H, 5.32; N, 3.92. C<sub>17</sub>H<sub>19</sub>NO<sub>5</sub>S requires C, 58.44; H, 5.48; N, 4.01%).

**(+)-(R)-2-(Toluene-4-sulfonamido)-3-(4-methoxyphenyl)propan-1-ol (3)**

(+)-(S)-3-Hydroxy-1-(4-methoxyphenyl)-2-(toluene-4-sulfonamido)propan-1-one (30.1 g, 85.9 mmol, 1.0 equiv) was dissolved in trifluoroacetic acid (132 ml, 1.72 mol, 20.0 equiv), treated dropwise with triethylsilane (137 ml, 860 mmol, 10.0 equiv) over 3 h and stirred at 40 °C for 1 d. NaOH (2 M; 1.5 l) was then added and the mixture extracted with EtOAc (3 x 500 ml). The combined organic extracts were concentrated under reduced pressure and the resulting residue stirred with 4% NaOH–MeOH (500 ml) for 1 h. The solution was then diluted with Et<sub>2</sub>O (500 ml) and HCl (2 M; 500 ml) and the aqueous phase extracted with Et<sub>2</sub>O (2 x 500 ml). The combined organic extracts were washed with H<sub>2</sub>O (500 ml), brine (500 ml) and dried (MgSO<sub>4</sub>). Concentration under reduced pressure and chromatography (60% Et<sub>2</sub>O–petrol) gave alcohol **3** (27.0 g, 93%) as a colourless oil; *R<sub>f</sub>* 0.65 (90% CH<sub>2</sub>Cl<sub>2</sub>–EtOAc); [α]<sub>D</sub><sup>20</sup> +12.7 (*c* 1.3, CHCl<sub>3</sub>); *v*<sub>max</sub> (film) 3517, 3289, 1612, 1598, 1440, 1423, 1320, 1247, 1157, 1091, 1037, 813, 665, 549 cm<sup>-1</sup>; δ<sub>H</sub> (300 MHz) 7.59 (2H, d, *J* 8.0 Hz, *ortho* Ts), 7.22 (2H, d, *J* 8.0 Hz, *meta* Ts), 6.90 (2H, d, *J* 9.0 Hz, *meta* ArOMe), 6.72 (2H, d, *J* 9.0 Hz, *ortho* ArOMe), 4.86 (1H, d, *J* 7.0 Hz, NHTs), 3.79 (3H, s, OMe of ArOMe), 3.66 (1H, dd, *J* 15.0, 5.0 Hz, CHHOH) 3.55 (1H, dd, *J* 11.0, 5.0 Hz, CHHOH) 3.41-3.39 (1H, m, CHNHTs), 2.74 (1H, dd, *J* 14.0, 7.0 Hz, CHHArOMe), 2.62 (1H, dd, *J* 14.0, 8.0 Hz, CHHArOMe) 2.44 (3H, s, Me of Ts); δ<sub>C</sub> (67.5 MHz) 158.3, 143.2, 137.2, 130.2, 129.7, 129.1, 127.0, 114.0, 64.2, 57.2, 55.2, 36.8, 21.6; *m/z* (CI) 353 [M+NH<sub>4</sub>]<sup>+</sup>, 336 [M+H]<sup>+</sup>, 189 (Found: [M+H]<sup>+</sup>, 336.1272. C<sub>17</sub>H<sub>21</sub>NO<sub>4</sub>S requires [M+H]<sup>+</sup>, 336.1270).

**(+)-(R)-(E)-Ethyl 5-(4-methoxyphenyl)-4-(toluene-4-sulfonamido)pent-2-enoate**

To a solution of (COCl)<sub>2</sub> (470 μl, 5.40 mmol, 1.2 equiv) in CH<sub>2</sub>Cl<sub>2</sub> (8 ml) at -78 °C was added DMSO (767 μl, 10.8 mmol, 2.4 equiv) in CH<sub>2</sub>Cl<sub>2</sub> (8 ml). After 5 min (+)-(R)-2-(toluene-4-sulfonamido)-3-(4-methoxyphenyl)propan-1-ol (1.50 g, 4.48 mmol, 1.0 equiv) in CH<sub>2</sub>Cl<sub>2</sub> (10 ml) was added and the solution stirred at -78 °C for 45 min. Et<sub>3</sub>N (3.14 ml, 22.5 mmol, 5.0 equiv) in CH<sub>2</sub>Cl<sub>2</sub> (5 ml) was then added and the solution warmed to 0 °C over 30 min and then to rt. After 10 min the mixture was diluted with CH<sub>2</sub>Cl<sub>2</sub> (25 ml) and washed with saturated aqueous NaHCO<sub>3</sub> (50 ml). The aqueous layer was extracted with CH<sub>2</sub>Cl<sub>2</sub> (2 x 50 ml) and the combined organic extracts washed with H<sub>2</sub>O (100 ml), brine (100 ml) and dried (Na<sub>2</sub>SO<sub>4</sub>). Concentration under reduced pressure gave the crude aldehyde as a yellow oil. This was immediately dissolved in CH<sub>2</sub>Cl<sub>2</sub> (50 ml) and to it was added Ph<sub>3</sub>PCHCO<sub>2</sub>Et (7.83 g, 22.5 mmol, 5.0 equiv). After 12 h the reaction was

concentrated under reduced pressure and triturated with Et<sub>2</sub>O (250 ml) to precipitate triphenylphosphine oxide. Concentration of the filtrate under reduced pressure and chromatography (50% EtOAc–petrol) gave the *ester* (1.60 g, 86%) as a colourless oil;  $R_f$  0.65 (50% EtOAc–petrol);  $[\alpha]_D^{20} +29.6$  ( $c$  0.5, CHCl<sub>3</sub>);  $\nu_{\max}$  (film) 3274, 2981, 1716, 1658, 1612, 1513, 1444, 1369, 1322, 1303, 1282, 1249, 1178, 1159, 1093, 1035, 973, 813, 667, 580;  $\delta_H$  (300 MHz) 7.56 (2H, d,  $J$  8.0 Hz, *ortho* Ts), 7.20 (2H, d,  $J$  8.0 Hz, *meta* Ts), 6.88 (2H, d,  $J$  8.5 Hz, *meta* ArOMe), 6.78 (1H, d, 16.0 Hz, CHCO<sub>2</sub>Et), 6.71 (2H, d,  $J$  9.0 Hz, *ortho* ArOMe), 5.81 (1H, dd,  $J$  16.0, 1.5 Hz, CH=CHCHNHTs), 4.44 (1H, d,  $J$  7.0 Hz, NHTs), 4.18-4.07 (3H, m, CHNTs and CO<sub>2</sub>CH<sub>2</sub>CH<sub>3</sub>), 3.77 (3H, s, OMe of ArOMe), 2.78 (2H, dd,  $J$  14.0, 5.0 Hz, CHHArOMe) 2.66 (2H, dd,  $J$  14.0, 7.0 Hz, CHHArOMe), 2.40 (3H, s, Me of Ts), 1.25 (3H, t,  $J$  7.0 Hz, CO<sub>2</sub>CH<sub>2</sub>CH<sub>3</sub>);  $\delta_C$  (67.5 MHz) 165.9 (C=O), 158.5 (q Ar), 146.3 (CH=CHCO<sub>2</sub>Et), [143.5, 137.2, 127.1 (q Ar)], [130.4, 129.7, 127.1, 122.4, 114.2 (ArH and CH=CHCO<sub>2</sub>Et)], 60.6 (OCH<sub>2</sub>CH<sub>3</sub>), 55.6 (CHNHTs), 55.3 (OMe of ArOMe), 40.3 (CH<sub>2</sub>Ar), 21.6 (Me of Ts), 14.3 (OCH<sub>2</sub>CH<sub>3</sub>);  $m/z$  (CI) 421 [M+NH<sub>4</sub>]<sup>+</sup>, 252, 189 (Found: [M+NH<sub>4</sub>]<sup>+</sup>, 421.1786. C<sub>21</sub>H<sub>25</sub>NO<sub>5</sub>S requires [M+NH<sub>4</sub>]<sup>+</sup>, 421.1797).

#### **(+)-(R)-(E)-5-(4-Methoxyphenyl)-4-(toluene-4-sulfonamido)pent-2-enol**

To a solution of (+)-(R)-(E)-ethyl 5-(4-methoxyphenyl)-4-(toluene-4-sulfonamido)pent-2-enoate (685 mg, 1.70 mmol, 1.0 equiv), in CH<sub>2</sub>Cl<sub>2</sub> (18 ml) at -78 °C was added DIBAL-H (6.12 ml of a 1 M solution in CH<sub>2</sub>Cl<sub>2</sub>, 6.12 mmol, 3.6 equiv). After 1 h MeOH (15 ml) and H<sub>2</sub>O (15 ml) were added at -50 °C and the mixture stirred for 10 min. The reaction mixture was then diluted with EtOAc (100 ml), poured onto NaHCO<sub>3</sub> (25 g) and Na<sub>2</sub>SO<sub>4</sub> (25 g) and stirred for 30 min. Filtration, concentration under reduced pressure and chromatography (50% EtOAc–petrol) gave the *allylic alcohol* (466 mg, 76%) as a pale yellow oil;  $R_f$  0.37 (50% EtOAc–petrol);  $[\alpha]_D^{20} +7.5$  ( $c$  1.0, CHCl<sub>3</sub>);  $\nu_{\max}$  (film) 3502, 3284, 2924, 1612, 1598, 1511, 1440, 1421, 1320, 1247, 1178, 1157, 1091, 1035, 993, 970, 813;  $\delta_H$  (300 MHz) 7.60 (2H, d,  $J$  8.0 Hz, *ortho* Ts), 7.24 (2H, d,  $J$  8.0 Hz, *meta* Ts), 6.95 (2H, d,  $J$  8.5 Hz *ortho* ArOMe), 6.77 (2H, d,  $J$  8.5 Hz, *meta* ArOMe), 5.64 (1H, dt,  $J$  16.0, 4.0 Hz, CH=CHCHNHTs), 5.52 (1H, dd,  $J$  16.0, 6.0 Hz, CH=CHCHNHTs), 4.02-4.00 (3H, m, CH<sub>2</sub>OH and CHNHTs), 3.81 (3H, s, OMe of ArOMe), 2.76 (2H, dd,  $J$  14.0, 5.0 Hz, CHHArOMe), 2.66 (2H, dd,  $J$  14.0, 7.0 Hz, CHHArOMe), 2.40 (3H, s, Me of Ts);  $\delta_C$  (67.5 MHz) [158.6, 143.3, 137.6 (q Ar)], 131.3, 130.6 (CH=CHCO<sub>2</sub>Et), [130.5, 129.5 (ArH)], 128.1 (q Ar), [127.3, 114.0 (ArH)], 62.7 (CH<sub>2</sub>OH), 56.4 (CHNHTs), 55.3 (OMe of ArOMe), 41.1 (CH<sub>2</sub>ArOMe), 21.6 (Me of Ts);  $m/z$  (CI) 379 [M+NH<sub>4</sub>]<sup>+</sup>, 189, 150, 132 (Found: [M+NH<sub>4</sub>]<sup>+</sup>, 379.1694. C<sub>19</sub>H<sub>23</sub>NO<sub>4</sub>S requires [M+NH<sub>4</sub>]<sup>+</sup>, 379.1692).

**(R)-(E)-5-(4-Methoxyphenyl)-4-(4-methylbenzylamino)pent-2-enol (4)**

To a solution of sodium (823 mg, 35.8 mmol, 6.0 equiv) dissolved in liquid ammonia (*ca.* 65 ml) at  $-78$  °C was added (+)-(R)-(E)-5-(4-methoxyphenyl)-4-(toluene-4-sulfonamido)pent-2-en-1-ol (2.00 g, 5.54 mmol, 1.0 equiv). After 30 min MeOH (5 ml) was added dropwise until the colour was discharged. The ammonia was then allowed to evaporate and the remaining residue partitioned between H<sub>2</sub>O (100 ml) and CH<sub>2</sub>Cl<sub>2</sub> (100 ml) and the aqueous layer was extracted with CH<sub>2</sub>Cl<sub>2</sub> (3 x 100 ml). The combined organic extracts were then dried (Na<sub>2</sub>SO<sub>4</sub>) and the solvent removed under reduced pressure to give (R)-(E)-4-amino-5-(4-methoxyphenyl)pent-2-en-1-ol (1.1 g, 5.37 mmol) as a brown oil;  $\delta_{\text{H}}$  (300 MHz) 7.13 (2H, d, J 8.5 Hz, *ortho* ArOMe), 6.87 (2H, d, J 8.5 Hz, *meta* ArOMe), 5.78-5.77 (2H, m, CH=CH), 4.12-4.11 (2H, m, CH<sub>2</sub>OH), 3.80 (3H, s, OMe of ArOMe), 3.63-3.58 (1H, m, CHNH<sub>2</sub>), 2.83-2.76 (2H, m, CHHArOMe), 2.57 (1H, dd, J 13.5, 8.5 Hz, CHHArOMe). 4-Methylbenzaldehyde (2.50 ml, 21.2 mmol, 4.0 equiv), the crude primary amine (1.10 g, 5.3 mmol, 1.0 equiv), MeOH (20 ml), 4 Å MS (2 g), AcOH (10 ml) and THF (20 ml) were stirred together for 1 h at room temperature. NaCNBH<sub>3</sub> (1.64 g, 26.5 mmol, 5.0 equiv) was then added in portions over 3 h, after which time the reaction was filtered through celite and concentrated under reduced pressure. The residue was portioned between Et<sub>2</sub>O (100 ml) and NaOH (2 M; 100 ml). The organic layer was washed with H<sub>2</sub>O (100 ml), brine (100 ml), dried (MgSO<sub>4</sub>) and concentrated under reduced pressure. Chromatography (MeOH–CH<sub>2</sub>Cl<sub>2</sub>) yielded the *amine* **4** (1.00 g, 60%) as a colourless oil;  $R_{\text{f}}$  0.10 (90% CH<sub>2</sub>Cl<sub>2</sub>–Et<sub>2</sub>O);  $[\alpha]_{\text{D}}^{24} +40.0$  (*c* 0.1, CHCl<sub>3</sub>);  $\nu_{\text{max}}$  (film) 3305, 3004, 2919, 2834, 1612, 1511, 1456, 1230, 1248, 1178, 1095, 1036, 808 cm<sup>-1</sup>;  $\delta_{\text{H}}$  (300 MHz); 7.13-7.05 (6H, m, ArMe, and *ortho* ArOMe), 6.84 (2H, d, J 9.0 Hz, *meta* ArOMe), 5.69-5.64 (2H, m, CH=CH), 4.14 (2H, d, J 5.0 Hz, CH<sub>2</sub>OH), 3.81 (3H, s, OMe of ArOMe), 3.76 (1H, d, J 14.0 Hz, CHHArMe), 3.55 (1H, d, J 14.0 Hz, CHHArMe), 3.31 (1H, q, J 6.0 Hz, CHNHArMe), 2.77-2.75 (2H, m, CH<sub>2</sub>ArOMe), 2.34 (3H, s, Me of CH<sub>2</sub>ArMe);  $\delta_{\text{C}}$  (75 MHz) 158.6, 136.9, 133.1, 132.6, 130.8, 130.6, 130.5, 129.5, 128.7, 114.5, 63.0, 61.1, 55.7, 51.2, 41.7, 21.5;  $m/z$  (CI) 312 [MH]<sup>+</sup>, 294, 190, 122, 105 (Found: [MH]<sup>+</sup>, 312.1955. C<sub>20</sub>H<sub>25</sub>O<sub>2</sub>N requires [MH]<sup>+</sup>, 312.1964) (Found: C, 77.23; H, 8.13; N, 4.45. C<sub>20</sub>H<sub>25</sub>O<sub>2</sub>N requires C, 77.14; H, 8.10; N, 4.50%).

**(+)-(R)-(E)-5-(4-Methoxyphenyl)-4-[(4-methylbenzyl)[(toluene-4-sulfonyl)acetyl]amino]pent-2-enol**

To a solution of amine **4** (250 mg, 0.804 mmol, 1.0 equiv) and tosylacetic acid (342 mg, 1.61 mmol, 2.0 equiv) in CH<sub>2</sub>Cl<sub>2</sub> (3 ml) was added DCC (350 mg, 1.77 mmol, 2.1 equiv). The reaction was stirred at rt for 15 h and was then filtered and stirred in 4% NaOH–MeOH for 1 h. The mixture was then concentrated under reduced pressure and the residue partitioned between EtOAc (50 ml) and HCl (2 M; 50 ml). The aqueous phase was then extracted with EtOAc (2 x 50 ml) and the combined

organic extracts washed with saturated aqueous NaHCO<sub>3</sub> (100 ml) and dried (Na<sub>2</sub>SO<sub>4</sub>). Concentration under reduced pressure gave (+)-(R)-(E)-5-(4-methoxyphenyl)-4-[(4-methylbenzyl)[(toluene-4-sulfonyl)acetyl]amino}pent-2-enol (370 mg, 91%) as a colourless oil; R<sub>f</sub> 0.84 (10% MeOH–CH<sub>2</sub>Cl<sub>2</sub>); [α]<sub>D</sub><sup>25</sup> +27.2 (c 2.5, CHCl<sub>3</sub>); ν<sub>max</sub> (film) 3443, 1642, 1318 cm<sup>-1</sup>; δ<sub>H</sub> (400 MHz) 7.71 (1.4H, d, J 8.0 Hz, *ortho* Ts rotamer 1) 7.70 (0.88H, d, J 8.0 Hz, *ortho* Ts rotamer 2), 7.28 (1.12H, d, J 8.0 Hz, *meta* Ts rotamer 1), 7.28 (0.6H, d, J 8.0 Hz, *meta* Ts rotamer 2), 7.26-7.09 (2.88H, m, *ortho* ArMe rotamer 1 and rotamer 2 and *meta* ArOMe rotamer 2), 7.05-7.01 (2H, m, *ortho* ArOMe rotamer 1 and rotamer 2), 6.95 (1.12H, d, J 8.0 Hz, *ortho* ArMe), 6.82 (0.88H, d, J 9.0 Hz, *meta* ArOMe rotamer 2), 6.79 (1.12H, d, J 9.0 Hz, *meta* ArOMe, rotamer 1) 5.85 (0.44H, dt, J 16.0, 4.5 Hz CH=CHCH<sub>2</sub>OH rotamer 2), 5.74-5.69 (1.56H, m, CH=CHCH<sub>2</sub>OH rotamer 1 and CH=CHCH<sub>2</sub>OH rotamer 1 and rotamer 2), 4.95-4.96 (0.56H, CHN rotamer 1), 4.80-4.83 (0.44H, CHN rotamer 2), 4.55-4.66 (1.56H, CH<sub>2</sub>Ts rotamer 1 and CHHTs rotamer 2), 4.41 (0.44H, d, J 15.0 Hz, CHHTs rotamer 2), 4.07-3.99 (3.12H, m, CH<sub>2</sub>ArMe rotamer 1 and CH<sub>2</sub>OH), 3.87 (0.44H, d, J 14.0 Hz, CHHArMe rotamer 2), 3.78 (3H, s, OMe of ArOMe), 3.71 (0.44H, d, J 14.0 Hz, CHHArMe rotamer 2), 3.00-2.79 (2H, m, CH<sub>2</sub>ArOMe), 2.45 (1.68H, s, Me of Ts rotamer 1), 2.42 (1.32H, s, Me of Ts rotamer 2), 2.33 (1.32H, s, Me of CH<sub>2</sub>ArMe rotamer 2), 2.32 (1.68H, s, Me of CH<sub>2</sub>ArMe rotamer 1); δ<sub>C</sub> (100 MHz); 162.4, 158.7, 158.3, 145.2, 137.5, 136.6, 136.1, 135.2, 133.6, 133.6, 132.9, 130.4, 130.3, 129.7, 129.6, 129.3, 129.1, 128.9, 128.6, 127.8, 126.3, 114.3, 113.9, 62.9, 62.8, 61.6, 60.9, 59.8, 59.5, 55.3, 49.5, 46.1, 37.7, 21.8, 21.1, 21.0; m/z (CI) 525 [M+NH<sub>4</sub>]<sup>+</sup>, 508 [M+H]<sup>+</sup>, 354, 238 (Found: [M+H]<sup>+</sup>, 508.2152. C<sub>29</sub>H<sub>33</sub>NO<sub>5</sub>S requires [M+NH<sub>4</sub>]<sup>+</sup>, 508.2158).

**(+)-(R)-(E)-Carbonic acid 5-(4-methoxyphenyl)-4-[(4-methylbenzyl)-2-(toluene-4-sulfonyl)acetyl]amino]pent-2-enyl ester methyl ester (2)**

To a solution of (+)-(R)-(E)-5-(4-methoxyphenyl)-4-[(4-methylbenzyl)[(toluene-4-sulfonyl)acetyl]amino}pent-2-enol (600 mg, 1.18 mmol, 1.0 equiv) in CH<sub>2</sub>Cl<sub>2</sub> (10 ml) at 0 °C was added pyridine (130 μl, 2.40 mmol, 2.0 equiv), methyl chloroformate (290 μl, 2.40 mmol, 2.0 equiv) and DMAP (14.4 mg, 0.118 mmol, 0.1 equiv). The reaction was brought to rt for 1 h and then quenched with saturated aqueous NH<sub>4</sub>Cl (10 ml). The organic phase washed with H<sub>2</sub>O (10 ml) brine (10 ml) and dried (Na<sub>2</sub>SO<sub>4</sub>). Concentration under reduced pressure and chromatography (40% EtOAc–petrol) gave the *carbonate 2* (650 mg, 96%) as a colourless oil; R<sub>f</sub> 0.72 (60% EtOAc–petrol); [α]<sub>D</sub><sup>22</sup> +24.0 (c 0.5, CHCl<sub>3</sub>); ν<sub>max</sub> (film) 1747, 1647, 1514, 1443, 1265, 1155, 793 cm<sup>-1</sup>; δ<sub>H</sub> (400 MHz) 7.69 (1.32H, d, J 8.0 Hz, *ortho* Ts rotamer 1), 7.65 (0.68H, d, J 8.0 Hz, *ortho* Ts rotamer 2), 7.29 (1.32H, d, J 8.0 Hz, *meta* Ts rotamer 1), 7.21 (0.68H, d, J 8.0 Hz, *meta* Ts rotamer 2), 7.10 (0.68H, d, J 8.0 Hz, *ortho* CH<sub>2</sub>ArMe rotamer 2), 7.05 (2H, m, *meta* CH<sub>2</sub>ArMe rotamer 2 and *ortho* CH<sub>2</sub>ArMe rotamer 1) 7.00-6.96 (2H, m, *meta* ArOMe rotamer 1 and rotamer 2),

6.91 (1.32H, d, J 8.0 Hz, *meta* CH<sub>2</sub>ArMe rotamer 1), 6.78-6.73 (2H, m, *ortho* ArOMe), 5.85-5.76 (1.34H, m, CH<sub>2</sub>CH=CH and CH<sub>2</sub>CH=CH rotamer 2), 5.59 (0.66H, dt, J 16.0, 6.0 Hz, CH<sub>2</sub>CH=CH rotamer 1), 4.82 (1H, m, CHN), 4.61 (0.66H, d, J 18.0 Hz, CHHTs rotamer 1), 4.53-4.44 (3H, m, CH<sub>2</sub>OCO<sub>2</sub>Me, CHHTs rotamer 1 and CHHTs rotamer 2), 4.39 (0.34H, d, J 15.0 Hz, CHHTs rotamer 2), 4.10-4.02 (1.32H, m, CH<sub>2</sub>ArMe rotamer 1), 3.87 (0.34H, d, J 14.0 Hz, CHHArMe rotamer 2), 3.71-3.64 (6.34H, m, OMe of ArOMe, OCO<sub>2</sub>CH<sub>3</sub> and CHHArMe rotamer 2), 2.92-2.75 (2H, m, CH<sub>2</sub>ArOMe), 2.38 (1.98H, s, Me of Ts rotamer 1), 2.35 (1.02H, s, Me of Ts rotamer 2), 2.29 (1.02H, s, Me of CH<sub>2</sub>ArMe rotamer 2), 2.28 (1.98H, s, Me of CH<sub>2</sub>ArMe rotamer 1); δ<sub>C</sub> (100 MHz) 162.4 (OCO<sub>2</sub>Me rotamer 1), 162.3 (OCO<sub>2</sub>Me rotamer 2), 158.6 (NCOCH<sub>2</sub> rotamer 2), 158.3 (NCOCH<sub>2</sub> rotamer 1), [145.1, 145.0, 137.3, 136.4, 136.0, 135.7, 134.9, 133.4, (q Ar)], 132.8 (CH<sub>2</sub>CH=CH rotamer 2), 132.1 (CH<sub>2</sub>CH=CH rotamer 1), 130.5, 130.2, 129.7, 129.6, 129.5 (ArH)], 129.4 (q Ar), [128.9, 128.6, 128.4, 127.9 (ArH)], 126.9 (CH<sub>2</sub>CH=CH rotamer 1), 126.6 (CH<sub>2</sub>CH=CH rotamer 2), [126.3, 114.1, 113.8 (ArH)], 67.4 (CH<sub>2</sub>OCO<sub>2</sub>Me rotamer 1), 67.3 (CH<sub>2</sub>OCO<sub>2</sub>Me rotamer 2), 61.5 (CHN rotamer 1), 60.7 (CH<sub>2</sub>ArMe rotamer 1), 59.8 (CHN rotamer 2), 59.6 (CH<sub>2</sub>ArMe rotamer 2), [55.1 and 54.8, (OMe of ArOMe and OCO<sub>2</sub>CH<sub>3</sub>)], 49.8 (CH<sub>2</sub>Ts rotamer 1), 46.0 (CH<sub>2</sub>Ts rotamer 2), 37.5 (CH<sub>2</sub>ArOMe), 21.7 (Me of CH<sub>2</sub>ArMe rotamer 1), 21.6 (Me of CH<sub>2</sub>ArMe rotamer 2), 21.1 (Me of Ts rotamer 2), 21.0 (Me of Ts rotamer 2); *m/z* (CI) 583 [M+NH<sub>4</sub>]<sup>+</sup>, 566 [M+H]<sup>+</sup>, 490, 447, 412, 284, 240, 196, 133, 124 (Found: [M+NH<sub>4</sub>]<sup>+</sup>, 583.2479. C<sub>31</sub>H<sub>35</sub>NO<sub>7</sub>S requires [M+NH<sub>4</sub>]<sup>+</sup>, 583.2478) (Found: C, 65.71; H, 6.32; N, 2.40. C<sub>31</sub>H<sub>35</sub>NO<sub>7</sub>S requires C, 65.82; H, 6.24; N, 2.48%).

**(3*R*, 4*S*,5*R*)-5-(4-Methoxybenzyl)-1-(4-methylbenzyl)-3-(toluene-4-sulfonyl)-4-vinylpyrrolidin-2-one (1) and (3*S*,4*R*,5*R*)-5-(4-methoxybenzyl)-1-(4-methylbenzyl)-3-(toluene-4-sulfonyl)-4-vinylpyrrolidin-2-one (5)**

To carbonate **2** (500 mg, 0.890 mmol, 1.0 equiv), Pd<sub>2</sub>(dba)<sub>3</sub> (42 mg, 0.046 mmol, 5.0 mol%) and tris(2,4,6-trimethoxyphenyl)phosphine (244 mg, 0.458 mmol, 0.5 equiv) was added MeCN (10 ml) and the mixture stirred rapidly at rt. After 30 min the reaction mixture was concentrated under reduced pressure. Chromatography (50% Et<sub>2</sub>O–petrol) gave an inseparable 5.6:1 mixture of *γ*-lactam **1** and *γ*-lactam **5** (380 mg, 90%) as a colourless oil; R<sub>f</sub> 0.33; ν<sub>max</sub> (film) 2925, 1697, 1612, 1513, 1439, 1303, 1148, 813, 660 cm<sup>-1</sup>; δ<sub>H</sub> (400 MHz) 7.87 (2H, d, J 8.0 Hz, *ortho* Ts of **5**), 7.84 (2H, d, J 8.0 Hz, *ortho* Ts of **1**), 7.36 (2H, d, J 8.0 Hz, *meta* Ts of **1**), 7.11 (2H, d, J 8.0 Hz, *ortho* CH<sub>2</sub>ArMe of **1**), 7.10 (2H, d, J 8.0 Hz, *ortho* ArMe of **5**), 7.05 (2H, d, J 9.0 Hz, *ortho* ArOMe of **5**), 7.04 (2H, d, J 8.0 Hz, *meta* CH<sub>2</sub>ArMe), 6.94 (2H, d, J 8.0 Hz, *ortho* CH<sub>2</sub>ArMe of **1**), 6.90 (2H, d, J 9.0 Hz, *meta* ArOMe of **1**), 6.82 (2H, d, J 9.0 Hz, *meta* ArOMe of **5**), 6.78 (2H, d, J 9.0 Hz, *ortho* ArOMe of **1**), 5.83 (1H, ddd, J 17.0, 10.0, 9.5 Hz, CH=CH<sub>2</sub> of **1**), 5.41 (1H, ddd, J 17.0, 11.0, 7.0

Hz,  $CH=CH_2$  of **5**), 5.26 (1H, d, J 17.0 Hz, *trans*  $CH_2=CH$  of **1**), 5.12 (1H, d, J 10.0 Hz, *cis*  $CH_2=CH$  of **1**), 4.99 (1H, d, J 15.0 Hz,  $CHHN$  of **5**), 4.98 (1H, d, J 15.0 Hz,  $CHHN$  of **1**), 4.86 (1H, d, J 17.0, *trans*  $CH=CH_2$  of **5**), 4.72 (1H, d, 10.0 Hz, *cis*  $CH=CH_2$  of **5**), 4.01-4.00 (1H, m,  $CHN$  of **1**), 4.01 (1H, d, J 15.0 Hz,  $CHHN$  of **5**), 3.84 (1H, d, J 4.0 Hz,  $CHTs$  of **5**), 3.81 (3H, s, OMe of ArOMe of **5**), 3.80 (1H, d, J 3.5 Hz,  $CHTs$  of **1**), 3.77 (3H, s, OMe of ArOMe of **1**), 3.70 (1H, d, J 15.0 Hz,  $CHHN$  of **1**) 3.53-3.51 (1H, m,  $CHCH=CH_2$  of **1**), 3.39-3.33 (2H, m,  $CHCH=CH_2$  and  $CHN$  of **5**), 3.17 (1H, dd, J 14.0, 5.0 Hz,  $CHHArOMe$  of **5**), 2.80 (1H, dd, J 14.0, 10.0 Hz,  $CHHArOMe$  of **5**), 2.79 (1H, dd, J 14.0, 6.0 Hz  $CHHArOMe$  of **1**), 2.72 (1H, dd, J 14.0, 8.0 Hz,  $CHHArOMe$  of **1**), 2.48 (3H, s, Me of Ts of **5**), 2.45 (3H, s, Me of Ts of **1**), 2.35 (3H, s, Me of  $CH_2ArMe$  of **5**), 2.33 (3H, s, Me of  $CH_2ArMe$  of **1**);  $\delta_c$  (75 MHz) 165.6 (C=O, of **5**), 164.7 (C=O, of **1**), [158.5, 158.4, 145.2 (2 signals) (q Ar of **1** and **5**)], [137.6 137.3 (q Ar of **1** and **5**)], 137.0 ( $CH=CH_2$  of **5**), 135.0 (2 signals) (q Ar of **1** and **5**), 133.5 ( $CH=CH_2$  of **1**), [132.5, 132.2, 130.4, 130.3 (q Ar of **1** and **5**)], [129.7, 129.6, 129.5 (2 signals), 129.4, 129.3, 128.9, 128.2, 128.0, 127.7 (ArH of **1** and **5**)], 119.8 ( $CH=CH_2$  of **1**), 116.6 ( $CH=CH_2$  of **5**), [114.1, 114.0 (ArH of **1** and **5**)], 70.4 ( $CHTs$  of **1**), 71.3 ( $CHTs$  of **5**), 62.4 ( $CHN$  of **5**), 59.5 ( $CHN$  of **1**), 55.3 (OMe of  $CH_2ArOMe$  of **1** and **5**), 44.9 ( $CH_2N$  of **1** and **5**), 42.1 ( $CHCH=CH_2$  of **1**), 40.3 ( $CHCH=CH_2$  of **5**), 38.0 ( $CH_2ArOMe$  of **5**), 34.2 ( $CH_2ArOMe$  of **1**), 21.8 (Me of Ts of **1** and **5**), 21.1 (Me of  $CH_2ArMe$  of **1** and **5**);  $m/z$  (CI) 507  $[M+NH_4]^+$ , 490  $[M+H]^+$ , 436, 353, 336, 59, 53, 35 (Found:  $[MH]^+$ , 490.2071.  $C_{29}H_{31}O_4NS$  requires  $[MH]^+$ , 490.2052).

### **(S)-2-(Toluene-4-sulfonamido)propionic acid**

To a rapidly stirred solution of L-alanine (15.0 g, 170 mmol, 1.0 equiv) and TsCl (42.0 g, 220 mmol, 1.3 equiv) in EtOAc (400 ml) and H<sub>2</sub>O (120 ml) was added NaOH (230 ml of a 2 M aqueous solution, 460 mmol, 2.7 equiv) dropwise over 3 h. After a further 1 h the aqueous phase was separated, washed with Et<sub>2</sub>O (3 x 250 ml), acidified to pH 1 with concentrated HCl (20 ml) and extracted with EtOAc (3 x 250 ml). The combined organic extracts were dried (MgSO<sub>4</sub>) and concentrated under reduced pressure to yield (S)-2-(toluene-4-sulfonamido)propionic acid (30.0 g, 73%) as a colourless solid; mp 129–131 °C (EtOAc);  $\delta_H$  (300 MHz) 7.76 (2H, d, J 8.0 Hz, *ortho* Ts), 7.32 (2H, d, J 8.0 Hz, *meta* Ts), 5.32 (1H, d, J 10.0 Hz, NH), 4.05-4.00 (1H, m,  $CHNHTs$ ), 2.43 (3H, s, Me of Ts), 1.43 (3H, d, J 7.0 Hz,  $CHCH_3$ );  $m/z$  (CI) 303, 261  $[M+NH_4]^+$ , 240, 189, 174, 132, 86. *In agreement with published data.*<sup>2</sup>

### **(S)-3-Methyl-2-(toluene-4-sulfonamido)butyric acid**

To a rapidly stirred solution of L-valine (15.0 g, 130 mmol, 1.0 equiv) and TsCl (32.0 g, 170 mmol, 1.3 equiv) in EtOAc (276 ml) and H<sub>2</sub>O (82 ml) was added NaOH (175 ml of a 2 M aqueous solution,

350 mmol, 2.7 equiv) dropwise over 3 h. After a further 1 h the aqueous phase was separated, washed with Et<sub>2</sub>O (3 x 250 ml), acidified to pH 1 with concentrated HCl (20 ml) and extracted with EtOAc (3 x 250 ml). The combined organic extracts were dried (MgSO<sub>4</sub>) and concentrated under reduced pressure to yield (*S*)-3-methyl-2-(toluene-4-sulfonamido)butyric acid (15.0 g, 38%) as a white solid; mp 149–151 °C (EtOAc); δ<sub>H</sub> (300 MHz) 7.74 (2H, d, J 8.0 Hz, *ortho* Ts), 7.30 (2H, d, J 8.0 Hz, *meta* Ts), 5.14 (1H, d, J 10.0 Hz, NH), 3.81 (1H, dd, CHNHTs), 2.43 (3H, s, Me of Ts), 2.15-2.09 (1H, m, CH(CH<sub>3</sub>)<sub>2</sub>), 0.98 (3H, d, J 7.0 Hz, CH(CH<sub>3</sub>)<sub>2</sub>), 0.89 (3H, d, J 7.0 Hz, CH(CH<sub>3</sub>)<sub>2</sub>); *m/z* (CI) 271 [M+NH<sub>4</sub>]<sup>+</sup>, 189, 1174, 118, 106, 72. *In agreement with published data.*<sup>3</sup>

#### **(*S*)-4-Methyl-2-(toluene-4-sulfonamido)pentanoic acid**

To a rapidly stirred solution of L-leucine (20.0 g, 150 mmol, 1.0 equiv) and TsCl (36.4 g, 0.19 mol, 1.3 equiv) in EtOAc (300 ml) and H<sub>2</sub>O (100 ml) was added NaOH (205 ml of a 2 M aqueous solution, 410 mmol, 2.7 equiv) dropwise over 3 h. After a further 1 h the aqueous phase was separated, washed with Et<sub>2</sub>O (3 x 250 ml), acidified to pH 1 with concentrated HCl (20 ml) and extracted with EtOAc (3 x 250 ml). The combined organic extracts were dried (MgSO<sub>4</sub>) and concentrated under reduced pressure to yield (*S*)-4-methyl-2-(toluene-4-sulfonamido)pentanoic acid (32.0 g, 73%) as an odorous, off-white solid; mp 115–116 °C (EtOAc); δ<sub>H</sub> (300 MHz) 7.75 (2H, d, J 8.0 Hz, *ortho* Ts), 7.31 (2H, d, J 8.0 Hz, *meta* Ts), 5.07 (1H, d, J 10.0 Hz, NH), 3.96-3.91 (1H, m, CHNHTs), 2.44 (3H, s, Me of Ts), 1.81-1.74 (1H, m, CH(CH<sub>3</sub>)<sub>2</sub>), 1.56-1.51 (2H, m, CH<sub>2</sub><sup>i</sup>Pr), 0.92 (3H, d, J 7.0 Hz, CH(CH<sub>3</sub>)<sub>2</sub>), 0.85 (3H, d, J 7.0 Hz, CH(CH<sub>3</sub>)<sub>2</sub>); *m/z* (CI) 303 [M+NH<sub>4</sub>]<sup>+</sup>, 189, 86. *In agreement with published data.*<sup>4</sup>

#### **2-(Toluene-4-sulfonamido)hexanoic acid**

To a rapidly stirred solution of DL-norleucine (15.0 g, 110 mol, 1.0 equiv) and TsCl (27.3 g, 140 mol, 1.3 equiv) in EtOAc (400 ml) and H<sub>2</sub>O (120 ml) was added NaOH (230 ml of a 2 M aqueous solution, 460 mmol, 2.7 equiv) dropwise over 3 h. After a further 1 h the aqueous phase was separated, washed with Et<sub>2</sub>O, acidified to pH 1 with concentrated HCl (20 ml) and extracted with EtOAc (3 x 250 ml). The combined organic extracts were dried (MgSO<sub>4</sub>) and concentrated under reduced pressure to yield acid 2-(toluene-4-sulfonamido)hexanoic acid (30.2 g, 73%) as a colourless solid; mp 124 °C (EtOAc); δ<sub>H</sub> (300 MHz DMSO) 12.57 (1H, br s, CO<sub>2</sub>H), 8.03 (1H, d, J 9.0 Hz, NH), 7.66 (2H, d, J 8.0 Hz, *ortho* Ts), 7.36 (2H, d, J 8.0 Hz, *meta* Ts), 3.68-3.60 (1H, m, CHNHTs), 2.36 (3H, s, Me of Ts), 1.54-1.45 (2H, m, CH<sub>2</sub>CH), 1.13-1.08 (4H, m, (CH<sub>2</sub>)<sub>2</sub>Me), 0.75-0.71 (3H, m, Me of *n*Bu); *m/z* (CI) 303 [M+NH<sub>4</sub>]<sup>+</sup>, 206, 149, 103, 86. *In agreement with published data.*<sup>5</sup>

#### **(*S*)-2-(Toluene-4-sulfonamido)propan-1-ol**



To a solution of (*S*)-2-(toluene-4-sulfonamido)propionic acid (12.0 g, 49.0 mmol, 1.0 equiv) in THF (192 ml) at 0 °C was added LiAlH<sub>4</sub> (147 ml of a 1 M solution in THF, 147 mmol, 3.0 equiv), the reaction brought slowly to rt and then heated to reflux. After 2 h the reaction was quenched with EtOAc (20 ml), poured into Rochelle's salt (500 ml of a 50% sat. aq. solution) and stirred for 1 h. The solution was extracted with EtOAc (3 x 300 ml) and the combined organic extracts washed with brine (500 ml) and dried (MgSO<sub>4</sub>). Concentration under reduced pressure yielded (*S*)-2-(toluene-4-sulfonamido)propan-1-ol (10.9 g, 97%) as a colourless solid; mp 128–130 °C (Et<sub>2</sub>O); R<sub>f</sub> 0.85 (50% EtOAc–petrol); δ<sub>H</sub> (300 MHz) 7.80 (2H, d, J 8.0 Hz, *ortho* Ts), 7.33 (2H, d, J 8.0 Hz, *meta* Ts), 4.92 (1H, d J 6.5 Hz, NH), 3.60-3.36 (3H, m, CH<sub>2</sub>OH and CHNHTs), 2.45 (3H, s, Me of Ts), 2.16 (1H, s, OH), 1.05 (3H, d, CHCH<sub>3</sub>); *m/z* (CI) 247 [M+NH<sub>4</sub>]<sup>+</sup>, 230 [M+H]<sup>+</sup>, 189, 108, 76, 44. *In agreement with published data.*<sup>6</sup>

### **(*S*)-3-Methyl-2-(toluene-4-sulfonamido)butan-1-ol**

To a solution of (*S*)-3-methyl-2-(toluene-4-sulfonamido)butyric acid (12.0 g, 44.0 mmol, 1.0 equiv) in THF (192 ml) at 0 °C was added LiAlH<sub>4</sub> (132 ml of a 1 M solution in THF, 132 mmol, 3.0 equiv), the reaction brought slowly to rt and then heated to reflux. After 2 h the reaction was quenched with EtOAc (20 ml), poured into Rochelle's salt (500 ml of a 50% sat. aq. solution) and stirred for 1 h. The solution was extracted with EtOAc (3 x 300 ml) and the combined organic extracts washed with brine (500 ml) and dried (MgSO<sub>4</sub>). Concentration under reduced pressure yielded (*S*)-3-methyl-2-(toluene-4-sulfonamido)butan-1-ol (11.5 g, 99%) as a colourless solid; mp 74–75 °C (Et<sub>2</sub>O); R<sub>f</sub> 0.70 (50% EtOAc–petrol); δ<sub>H</sub> (300 MHz) 7.80 (2H, d, J 8.0 Hz, *ortho* TS), 7.33 (2H, d, J 8.0 Hz, *meta* Ts), 4.81 (1H, d J 8.0 Hz, NH), 3.59-3.58 (2H, m, CH<sub>2</sub>OH), 3.08-3.02 (1H, m, CHNHTs), 2.45 (3H, s, Me of Ts), 2.06-2.00 (1H, m, OH), 1.83-1.77 (1H, m, CH CH(CH<sub>3</sub>)<sub>2</sub>), 0.81 (3H, d J 3.0 Hz, CH(CH<sub>2</sub>)<sub>2</sub>), 0.80 (3H, d J 3.0 Hz, CH(CH<sub>3</sub>)<sub>2</sub>). *m/z* (CI) 275 [M+NH<sub>4</sub>]<sup>+</sup>, 258 [M+H]<sup>+</sup>, 243. *In agreement with published data.*<sup>7</sup>

### **(*S*)-4-Methyl-2-(4-methyl benzenesulfonamido)pentan-1-ol**

To a solution of (*S*)-4-methyl-2-(toluene-4-sulfonamido)pentanoic acid 12.0 g, 31.0 mmol, 1.0 equiv) in THF (192 ml) at 0 °C was added LiAlH<sub>4</sub> (93 ml of a 1 M solution in THF, 93.0 mmol, 3.0 equiv), the reaction brought slowly to rt and then heated to reflux. After 2 h the reaction was quenched with EtOAc (20 ml), poured into Rochelle's salt (500 ml of a 50% saturated aqueous solution) and stirred for 1 h. The solution was extracted with EtOAc (3 x 300 ml) and the combined organic extracts washed with brine (500 ml) and dried (MgSO<sub>4</sub>). Concentration under reduced pressure yielded alcohol **214c** (11.0 g, 95%) as a colourless solid; mp 98–100 °C (Et<sub>2</sub>O); R<sub>f</sub> 0.74 (50% EtOAc–petrol); δ<sub>H</sub> (300 MHz) 7.80 (2H, d, J 8.0 Hz, *ortho* TS), 7.33 (2H, d, J 8.0 Hz, *meta*

# Supplementary Material (ESI) for Chemical Communications

# This journal is © The Royal Society of Chemistry 2005

Ts), 4.66 (1H, d, J 7.0 Hz, NH), 3.60-3.44 (2H, m, CH<sub>2</sub>OH), 3.32-3.31 (1H, m, CHNHTs), 2.45 (3H, s, Me of Ts), 1.62 (1H, s, OH), 1.52-1.44 (1H, m, CH(CH<sub>3</sub>)<sub>2</sub>), 1.28-1.26 (2H, m, CH<sub>2</sub><sup>i</sup>Pr), 0.80 (3H, d J 6.5 Hz, CH(CH<sub>3</sub>)<sub>2</sub>), 0.66 (3H, d J 6.5 Hz, CH(CH<sub>3</sub>)<sub>2</sub>); *m/z* (CI) 289 [M+NH<sub>4</sub>]<sup>+</sup>, 272 [M+H]<sup>+</sup>, 240, 189, 118, 86. *In agreement with published data.*<sup>7</sup>

## 2-(Toluene-4-sulfonamido)hexan-1-ol

A solution of 2-(toluene-4-sulfonamido)hexanoic acid (10.0 g, 35.1 mmol, 1.0 equiv) in THF (50 ml) was added to a suspension of LiAlH<sub>4</sub> (4.00 g, 105 mmol, 3.0 equiv) in THF (200 ml) at 0 °C. The resulting solution was warmed slowly to rt and then heated to reflux. After 12 h the reaction was quenched with EtOAc (50 ml) and poured into Rochelle's salt (500 ml of a 50% saturated aqueous solution) and stirred for 1 h. The solution was extracted with EtOAc (3 x 300 ml) and the combined organic extracts washed with brine (500 ml) and dried (MgSO<sub>4</sub>). Concentration under reduced pressure yielded 2-(toluene-4-sulfonamido)hexan-1-ol (9.50 g, 99%) as a colourless crystalline solid; mp 61–62 °C (Et<sub>2</sub>O–petrol); R<sub>f</sub> 0.35 (50% EtOAc–petrol); ν<sub>max</sub> (film) 3498, 3278, 2954, 2872, 1452, 1323, 1159, 1092, 816, 665 cm<sup>-1</sup>; δ<sub>H</sub> (300 MHz) 7.80 (2H, d, J 8.0 Hz, *ortho* Ts), 7.32 (2H, d, J 8.0 Hz, *meta* Ts), 5.13–5.06 (1H, m, NH), 3.60–3.47 (2H, m, CH<sub>2</sub>OH), 3.24–3.22 (1H, m, CHNHTs), 2.44 (4H, br s, Me of Ts and OH), 1.44–1.33 (2H, m, CH<sub>2</sub>(CH<sub>2</sub>)<sub>2</sub>CH<sub>3</sub>), 1.17–1.02 (4H, m, CH<sub>2</sub>(CH<sub>2</sub>)<sub>2</sub>CH<sub>3</sub>), 0.76 (3H, t, J 6.0 Hz, CH<sub>2</sub>(CH<sub>2</sub>)<sub>2</sub>CH<sub>3</sub>); δ<sub>C</sub> (75 MHz) 143.6, 137.6, 129.7, 127.2, 64.9, 55.7, 31.4, 27.7, 22.3, 21.6, 13.8; *m/z* (CI) 289 [M+NH<sub>4</sub>]<sup>+</sup>, 272 [M+H]<sup>+</sup>, 240, 189, 118, 86 (Found: C, 57.52; H, 7.59; N, 5.19. C<sub>13</sub>H<sub>21</sub>NO<sub>3</sub>S requires C, 57.54; H, 7.80; N, 5.16%).

## (–)-(S)-(E)-Ethyl 4-(toluene-4-sulfonamido)pent-2-enoate

To a solution of oxalyl chloride (4.50 ml, 52.1 mmol, 1.2 equiv) in CH<sub>2</sub>Cl<sub>2</sub> (50 ml) at –78 °C was added DMSO (7.40 ml, 104 mmol, 2.4 equiv) in CH<sub>2</sub>Cl<sub>2</sub> (50 ml). After 5 min a solution of (S)-2-(toluene-4-sulfonamido)propan-1-ol (10.0 g, 43.4 mmol, 1.0 equiv) in CH<sub>2</sub>Cl<sub>2</sub> (75 ml) was added dropwise with stirring. After a further 45 min Et<sub>3</sub>N (30.2 ml, 217 mmol, 5.0 equiv) in CH<sub>2</sub>Cl<sub>2</sub> (30 ml) was added dropwise and the solution brought slowly to rt. After a further 30 minutes the reaction mixture was diluted with CH<sub>2</sub>Cl<sub>2</sub> (500 ml), washed with saturated aqueous NaHCO<sub>3</sub> (400 ml) and the aqueous layer re-extracted with CH<sub>2</sub>Cl<sub>2</sub> (100 ml). The combined organic extracts were then washed with acetic acid (1 M; 100 ml), H<sub>2</sub>O (400 ml), brine (400 ml) and dried (Na<sub>2</sub>SO<sub>4</sub>). Concentration under reduced pressure gave the crude aldehyde as an orange oil that was immediately dissolved in CH<sub>2</sub>Cl<sub>2</sub> (500 ml) and Ph<sub>3</sub>PCHCO<sub>2</sub>Et (53.9 g, 154.8 mmol, 4 equiv) added at rt with stirring. After 12 h the mixture was concentrated under reduced pressure and triturated with Et<sub>2</sub>O (250 ml) to remove triphenylphosphine oxide. Chromatography (30% EtOAc–petrol) gave (–)-(S)-(E)-ethyl 4-(toluene-4-sulfonamido)pent-2-enoate (8.73 g, 67%) as a colourless oil; R<sub>f</sub> 0.33 (30% EtOAc–petrol); [α]<sub>D</sub><sup>16</sup> –60.0 (*c* 1.0, CHCl<sub>3</sub>); ν<sub>max</sub> (film) 1716, 1659, 1369, 1305, 1156, 1093, 977, 815, 666 cm<sup>-1</sup>; δ<sub>H</sub> (300 MHz) 7.76 (2H, d, J 8.0 Hz, *ortho* TS), 7.31 (2H, d, J 8.0 Hz, *meta* Ts), 6.67 (1H, dd, J 16.0, 6.0 Hz, CH=CHCO<sub>2</sub>Et), 5.83 (1H, d, J 16.0 Hz C=CHCO<sub>2</sub>Et), 4.89 (1H, d, J 8.0 Hz, NH), 4.16 (2H, q, J 7.0 Hz, CH<sub>2</sub>CH<sub>3</sub>), 5.06 (1H, q, J 6.0 Hz, CHNHTs), 2.43 (3H, s, Me of Ts), 1.27 (3H, t, J 7.0 Hz, CH<sub>2</sub>CH<sub>3</sub>) 1.22 (3H, d, J 7.0 Hz, CHCH<sub>3</sub>); δ<sub>C</sub> (75 MHz) 172.5,

147.6, 143.7, 137.5, 129.8, 127.2, 121.4, 60.6, 50.2, 21.6, 21.2, 14.2;  $m/z$  (CI) 315  $[M+NH_4]^+$ , 298  $[M+H]^+$ , 189, 144  $[MH-Ts]^+$ , 52 (Found:  $[M+H]^+$ , 298.1118.  $C_{14}H_{19}NO_4S$  requires  $[M+H]^+$ , 298.1113) (Found: C, 56.72; H, 6.31; N, 4.75.  $C_{14}H_{19}NO_4S$  requires C, 56.55, 6.44, 4.71%).

#### **(-)-(S)-(E)-Ethyl 5-methyl-4-(toluene-4-sulfonamido)hex-2-enoate**

To a solution of oxalyl chloride (4.10 ml, 46.4 mmol, 1.2 equiv) in  $CH_2Cl_2$  (50 ml) at  $-78$  °C was added DMSO (6.60 ml, 92.9 mmol, 2.4 equiv) in  $CH_2Cl_2$  (50 ml). After 5 min a solution of (*S*)-3-methyl-2-(toluene-4-sulfonamido)butan-1-ol (10.0 g, 38.7 mmol, 1.0 equiv) in  $CH_2Cl_2$  (75 ml) was added dropwise with stirring. After a further 45 min  $Et_3N$  (27.0 ml, 193 mmol, 5.0 equiv) in  $CH_2Cl_2$  (30 ml) was added dropwise and the solution brought slowly to rt. After a further 30 minutes the reaction mixture was diluted with  $CH_2Cl_2$  (500 ml), washed with saturated aqueous  $NaHCO_3$  (400 ml) and the aqueous layer re-extracted with  $CH_2Cl_2$  (100 ml). The combined organic extracts were then washed with acetic acid (1 M; 100 ml),  $H_2O$  (400 ml), brine (400 ml) and dried ( $Na_2SO_4$ ). Concentration under reduced pressure gave the crude aldehyde as an orange oil that was immediately dissolved in  $CH_2Cl_2$  (500 ml) and  $Ph_3PCHCO_2Et$  (53.9 g, 154 mmol, 4.0 equiv) added at rt with stirring. After 12 h the mixture was concentrated under reduced pressure and triturated with  $Et_2O$  (250 ml) to remove triphenylphosphine oxide. Chromatography (30%  $EtOAc$ -petrol) gave (-)-(S)-(E)-ethyl 5-methyl-4-(toluene-4-sulfonamido)hex-2-enoate (11.2 g, 88% ) as a colourless crystalline solid; mp 88–90 °C ( $Et_2O$ );  $R_f$  0.50 (30%  $EtOAc$ -petrol);  $[\alpha]_D^{22}$   $-24.1$  ( $c$  1.0,  $CHCl_3$ );  $\nu_{max}$  (film) 3279, 2966, 1719, 1657, 1465, 1326, 1183, 1093, 1039, 984,  $667\text{cm}^{-1}$ ;  $\delta_H$  (300 MHz) 7.74 (2H, d,  $J$  8.0 Hz, *ortho* Ts), 7.28 (2H, d,  $J$  8.0 Hz, *meta* Ts), 6.59 (1H, dd,  $J$  16.0, 7.0 Hz,  $C=CHCH$ ), 5.67 (1H, d,  $J$  16.0 Hz  $=CHCO_2Et$ ), 5.14 (1H, d,  $J$  9.0 Hz, NH), 4.13 (2H, q,  $J$  7.0 Hz,  $CH_2CH_3$ ), 3.75 (1H, q,  $J$  7.0 Hz,  $CHNHTs$ ), 2.40 (3H, s, Me of Ts), 1.84–1.76 (1H, m,  $CH(CH_3)_2$ ) 1.26 (3H, t,  $J$  7.0 Hz,  $CH_2CH_3$ ), 0.86 (6H, t,  $J$  7.0 Hz,  $CH(CH_3)_2$ );  $\delta_C$  (75 MHz) 165.7, 145.2, 143.5, 137.7, 129.6, 127.2, 122.8, 60.5, 60.2, 32.7, 21.5, 18.5, 18.1, 14.2;  $m/z$  (CI) 343  $[M+NH_4]^+$ , 189 (Found: C, 59.23; H, 7.25; N, 4.34.  $C_{16}H_{23}NO_4S$  requires C, 59.05; H, 7.12; N, 4.30%).

#### **(-)-(S)-(E)-Ethyl 6-methyl-4-(toluene-4-sulfonamido)hept-2-enoate**

To a solution of oxalyl chloride (2.50 ml, 29.0 mmol, 1.2 equiv) in  $CH_2Cl_2$  (31 ml) at  $-78$  °C was added DMSO (4.10 ml, 58.1 mmol, 2.4 equiv) in  $CH_2Cl_2$  (31 ml). After 5 min a solution of (*S*)-4-methyl-2-(toluene-4-sulfonamido)pentan-1-ol (9.00 g, 24.2 mmol, 1.0 equiv) in  $CH_2Cl_2$  (47 ml) was added dropwise with stirring. After a further 45 min  $Et_3N$  (16.9 ml, 121 mmol, 5.0 equiv) in  $CH_2Cl_2$  (19 ml) was added dropwise and the solution brought slowly to rt. After a further 30 minutes the reaction mixture was diluted with  $CH_2Cl_2$  (500 ml), washed with saturated aqueous  $NaHCO_3$  (400 ml) and the aqueous layer re-extracted with  $CH_2Cl_2$  (100 ml). The combined organic extracts were

then washed with acetic acid (1 M; 100 ml), H<sub>2</sub>O (400 ml), brine (400 ml) and dried (Na<sub>2</sub>SO<sub>4</sub>). Concentration under reduced pressure gave the crude aldehyde as an orange oil that was immediately dissolved in CH<sub>2</sub>Cl<sub>2</sub> (500 ml) and Ph<sub>3</sub>PCHCO<sub>2</sub>Et (33.7g, 96.8 mmol, 4.0 equiv) added at rt with stirring. After 12 h the mixture was concentrated under reduced pressure and triturated with Et<sub>2</sub>O (250 ml) to remove triphenylphosphine oxide. Chromatography (30% EtOAc–petrol) gave (–)-(S)-(E)-ethyl 6-methyl-4-(toluene-4-sulfonamido)hept-2-enoate (8.40 g, 70 %) as a colourless oil; R<sub>f</sub> 0.52 (30% EtOAc–petrol); [α]<sub>D</sub><sup>22</sup> –44.0 (c 1.0, CHCl<sub>3</sub>); ν<sub>max</sub> (film) 3279, 2958, 1713, 1659, 1369, 1284, 1094, 813, 666 cm<sup>-1</sup>; δ<sub>H</sub> (300 MHz) 7.73 (2H, d, J 8.0 Hz, *ortho* Ts), 7.27 (2H, d, J 8.0 Hz, *meta* Ts), 6.55 (1H, dd J, 16.0, 7.0 Hz, CH=CHCH), 5.71 (1H, d, J 16.0 Hz, CH=CHCH), 5.40 (1H, d, J 8.0 Hz, NH), 4.11 (2H, q, J 7.0 Hz, CH<sub>2</sub>CH<sub>3</sub>), 3.91 (1H, quintet, J 7.5 Hz, CHNHTs), 2.39 (3H, s, Me of Ts), 1.57 (1H, sextet, J 7.0 Hz, CH(CH<sub>3</sub>)<sub>2</sub>) 1.39-1.21 (5H, m, CH<sub>2</sub><sup>i</sup>Pr and CH<sub>2</sub>CH<sub>3</sub>), 0.80 (3H, d, J 6.5 Hz, CH(CH<sub>3</sub>)<sub>2</sub>), 0.75 (3H, d, J 6.5 Hz, CH(CH<sub>3</sub>)<sub>2</sub>); δ<sub>C</sub> (75 MHz) 165.9, 146.9, 143.4, 137.7, 129.6, 127.2, 121.6, 60.4, 53.0, 44.0, 24.2, 22.4, 21.9, 21.5, 14.2; m/z (CI) 357 [M+NH<sub>4</sub>]<sup>+</sup>, 340 [M+H]<sup>+</sup>, 189 (Found: C, 60.22; H, 7.19; N, 4.14. C<sub>17</sub>H<sub>25</sub>NO<sub>4</sub>S requires C, 60.15; H, 7.42; N, 4.14%).

### (E)-Ethyl (toluene-4-sulfonamido)oct-2-enoate

To a solution of oxalyl chloride (1.94 ml, 22.2 mmol, 1.2 equiv) in CH<sub>2</sub>Cl<sub>2</sub> (25 ml) at –78 °C was added DMSO (3.15 ml, 44.4 mmol, 2.4 equiv) in CH<sub>2</sub>Cl<sub>2</sub> (25 ml). After 5 min a solution of 2-(toluene-4-sulfonamido)hexan-1-ol (5.00 g, 18.5 mmol, 1.0 equiv) in CH<sub>2</sub>Cl<sub>2</sub> (35 ml) was added dropwise with stirring. After a further 45 min Et<sub>3</sub>N (12.9 ml, 92.5 mmol, 5.0 equiv) in CH<sub>2</sub>Cl<sub>2</sub> (15 ml) was added dropwise and the solution brought slowly to rt. After a further 30 minutes the reaction mixture was diluted with CH<sub>2</sub>Cl<sub>2</sub> (250 ml), washed with saturated aqueous NaHCO<sub>3</sub> (200 ml) and the aqueous layer re-extracted with CH<sub>2</sub>Cl<sub>2</sub> (50 ml). The combined organic extracts are then washed with acetic acid (1 M; 50 ml), H<sub>2</sub>O (200 ml), brine (200 ml) and dried (Na<sub>2</sub>SO<sub>4</sub>). Concentration under reduced pressure gave the crude aldehyde as an orange oil that was immediately dissolved in CH<sub>2</sub>Cl<sub>2</sub> (250 ml) and Ph<sub>3</sub>PCHCO<sub>2</sub>Et (25.8 g, 74.0 mmol, 4.0 equiv) added at rt with stirring. After 12 h the mixture was concentrated under reduced pressure and triturated with Et<sub>2</sub>O (125 ml) to remove triphenylphosphine oxide. Chromatography (30% EtOAc–petrol) gave (E)-ethyl (toluene-4-sulfonamido)oct-2-enoate (5.00 g, 80%) a colourless oil; R<sub>f</sub> 0.30 (30% EtOAc–petrol); ν<sub>max</sub> (film) 2958, 1699, 1657, 1456, 1325, 1159 cm<sup>-1</sup>; δ<sub>H</sub> (300 MHz) 7.71 (2H, d, J 8.0 Hz, *ortho* Ts), 7.23 (2H, d, J 8.0 Hz, *meta* Ts), 6.57 (1H, dd J 16.0, 7.0 Hz, CH=CHCO<sub>2</sub>Et), 5.74-5.67 (2H, m, C=CHCO<sub>2</sub>Et and NH), 4.08 (1H, q J 7.0 Hz, OCH<sub>2</sub>), 3.83 (1H, t J 7.0 Hz, CHNHTs), 2.35 (3H, s, Me of Ts), 1.45-1.43 (2H, m CHCH<sub>2</sub>) 1.23-1.12 (7H, m, (CH<sub>2</sub>)<sub>2</sub> and OCH<sub>2</sub>CH<sub>3</sub>), 0.80-0.73 (3H, m, (CH<sub>2</sub>)<sub>3</sub>CH<sub>3</sub>); δ<sub>C</sub> (75 MHz) 166.0, 147.0, 143.3, 137.8, 129.6, 128.3,

121.7, 60.4, 54.7, 34.5, 27.3, 22.1, 21.4, 14.2, 13.7;  $m/z$  (CI) 357  $[M+NH_4]^+$ , 206, 189, 86 (Found:  $[M+NH_4]^+$ , 357.1846.  $C_{17}H_{29}N_2O_4S$  requires  $[M+H]^+$ , 357.1848) (Found: C, 59.96; H, 7.58; N, 4.13.  $C_{14}H_{25}N_2O_3S$  requires C, 60.15; H, 7.58; N, 4.13%).

#### **(-)-(S)-(E)-4-(Toluene-4-sulfonamide)pent-2-en-1-ol**

DIBAL-H (91.4 ml of a 1 M solution in  $CH_2Cl_2$ , 91.4 mmol, 3.6 equiv) was added dropwise to a solution of (-)-(S)-(E)-ethyl 4-(toluene-4-sulfonamido)pent-2-enoate (8.00 g, 25.4 mmol, 1.0 equiv) in  $CH_2Cl_2$  (200 ml) at  $-78$  °C with vigorous stirring. After 15 min the mixture was allowed to warm to rt. After a further 2 h the reaction was quenched with EtOAc (20 ml) and poured into Rochelle's salt (500 ml of a 50% saturated aqueous solution) and the resulting two phase mixture stirred until both layers became clear (1 h). The aqueous layer was extracted with EtOAc (2 x 300 ml) and the combined organic extracts washed with brine (500 ml) and dried ( $Na_2SO_4$ ). Concentration under reduced pressure gave alcohol (-)-(S)-(E)-4-(toluene-4-sulfonamido)pent-2-en-ol (6.01 g, 86%) as an off-white crystalline solid; mp 64–65 °C ( $Et_2O$ );  $R_f$  0.25 (50% EtOAc–petrol);  $[\alpha]_D^{23}$   $-40.0$  ( $c$  1.0,  $CHCl_3$ );  $\nu_{max}$  (film) 3479, 3273, 1450, 1313, 1147, 1093, 974, 816, 665  $cm^{-1}$ ;  $\delta_H$  (300 MHz) 7.77 (2H, d,  $J$  8.0 Hz, *ortho* Ts), 7.31 (2H, d,  $J$  8.0 Hz, *meta* Ts), 5.66 (1H, dt,  $J$  15.5, 5.0 Hz,  $CH=CHCH_2$ ), 5.51 (1H, dd,  $J$  15.5, 6.0 Hz,  $CH=CHCH_2$ ), 4.86 (2H, d,  $J$  7.0 Hz, NH), 4.00 (br s,  $CH_2OH$ ), 3.91 (1H, q,  $J$  7.0 Hz,  $CHNHTs$ ), 2.44 (3H, s, Me of Ts), 1.18 (3H, d,  $J$  7.0 Hz,  $CHCH_3$ );  $\delta_C$  (75 MHz) 143.4, 138.0, 132.1, 130.1, 129.6, 127.3, 62.7, 50.9, 21.7, 21.5;  $m/z$  (CI) 273  $[M+NH_4]^+$ , 189, 52 (Found:  $[M+NH_4]^+$ , 273.1297.  $C_{12}H_{17}NO_3S$  requires  $[M+NH_4]^+$ , 273.1273) (Found: C, 56.41; H, 6.57; N, 5.47.  $C_{12}H_{17}NO_3S$  requires C, 56.45; H, 6.71; N, 5.49%).

#### **(-)-(S)-(E)-5-Methyl-4-(toluene-4-sulfonamido)hex-2-en-1-ol**

DIBAL-H (94.3 ml of a 1 M solution in  $CH_2Cl_2$ , 94.3 mmol, 3.6 equiv) was added dropwise to a solution of (-)-(S)-(E)-ethyl 5-methyl-4-(toluene-4-sulfonamido)hex-2-enoate (8.50 g, 26.2 mmol, 1.0 equiv) in  $CH_2Cl_2$  (200 ml) at  $-78$  °C with vigorous stirring. After 15 min the mixture was allowed to warm to rt. After a further 2 h the reaction was quenched with EtOAc (20 ml), poured into Rochelle's salt (500 ml of a 50% saturated aqueous solution) and the resulting two phase mixture stirred until both layers became clear (1 h). The aqueous layer was extracted with EtOAc (2 x 300 ml) and the combined organic extracts washed with brine (500 ml) and dried ( $Na_2SO_4$ ). Concentration under reduced pressure gave alcohol (-)-(S)-(E)-5-methyl-4-(toluene-4-sulfonamido)hex-2-en-1-ol (6.20 g, 96%) as a colourless oil;  $R_f$  0.30 (50% EtOAc–petrol);  $[\alpha]_D^{22}$   $-28.0$  ( $c$  1.0,  $CHCl_3$ );  $\nu_{max}$  (film) 3569, 3126, 2964, 2873, 2360, 1452, 1396, 1317, 1153, 1092, 999  $cm^{-1}$ ;  $\delta_H$  (300 MHz) 7.75 (2H, d,  $J$  8.0 Hz, *ortho* Ts), 7.30–7.28 (2H, m, *meta* Ts), 5.49 (1H, dt,  $J$  15.5, 5.0 Hz,  $C=CHCH_2$ ), 5.38 (1H, dd,  $J$  15.5, 7.0 Hz,  $CH=CHCH_2$ ), 4.83 (1H, d,  $J$  8.0 Hz, NH),

3.94-3.91 (2H, m, CH<sub>2</sub>OH), 3.59 (1H, q, J 7.0 Hz, CHNHTs), 2.43 (3H, s, Me of Ts), 1.76-1.70 (1H, m, CH(CH<sub>3</sub>)<sub>2</sub>), 0.85 (6H, t, J 7.0 Hz, CH(CH<sub>3</sub>)<sub>2</sub>); δ<sub>C</sub> (75 MHz) 143.3, 138.1, 131.8, 129.5, 128.9, 127.4, 62.7, 61.0, 32.8, 21.5, 18.3 (2 signals); *m/z* (CI) 301 [M+NH<sub>4</sub>]<sup>+</sup>, 283, 266, 264, 202, 189, 112, 110, 72 (Found: [M+NH<sub>4</sub>]<sup>+</sup>, 301.1589. C<sub>14</sub>H<sub>25</sub>N<sub>2</sub>O<sub>3</sub>S requires [M+NH<sub>4</sub>]<sup>+</sup>, 301.1588) (Found: C, 59.57; H, 7.36; N, 4.70. C<sub>14</sub>H<sub>25</sub>N<sub>2</sub>O<sub>3</sub>S requires C, 59.34; H, 7.47; N, 4.94%).

#### **(-)-(S)-(E)-6-Methyl-4-(toluene-4-sulfonamido)hept-2-en-1-ol**

DIBAL-H (74.6 ml of a 1 M solution in CH<sub>2</sub>Cl<sub>2</sub>, 74.6 mmol, 3.6 equiv) was added dropwise to a solution of (-)-(S)-(E)-ethyl 6-methyl-4-(toluene-4-sulfonamido)hept-2-enoate (7.40 g, 20.7 mmol, 1.0 equiv) in CH<sub>2</sub>Cl<sub>2</sub> (200 ml) at -78 °C with vigorous stirring. After 15 min the mixture was allowed to warm to rt. After a further 2 h the reaction was quenched with EtOAc (20 ml), poured into Rochelle's salt (500 ml of a 50% saturated aqueous solution) and the resulting two phase mixture stirred until both layers became clear (1 h). The aqueous layer was extracted with EtOAc (2 x 300 ml) and the combined organic extracts washed with brine (500 ml) and dried (Na<sub>2</sub>SO<sub>4</sub>). Concentration under reduced pressure gave (-)-(S)-(E)-6-methyl-4-(toluene-4-sulfonamido)hept-2-enol (7.3 g, 98%) as a colourless crystalline solid; mp 101–102 °C (EtOAc); R<sub>f</sub> 0.45 (50% EtOAc–petrol); [α]<sub>D</sub><sup>22</sup> -8.0 (*c* 1.0, CHCl<sub>3</sub>); ν<sub>max</sub> (film) 3460, 3180, 2954, 2362, 1319, 1146, 1090 cm<sup>-1</sup>; δ<sub>H</sub> (300 MHz) 7.56 (2H, d, J 8.0 Hz, *ortho* Ts), 7.31 (2H, d, J 8.0 Hz, *meta* Ts), 5.53-5.61 (1H, dt, J 15.0, 5.0 Hz, C=CHCH<sub>2</sub>); 5.35 (1H, dd, J 15.0, 7.0 Hz, CHCH=CH), 4.49 (1H, d, J 8.0 Hz, NH), 3.93-3.89 (2H, m CH<sub>2</sub>OH), 3.84 (1H, t, J 8.0 Hz, CHNHTs), 2.44 (3H, s, Me of Ts), 1.64-1.56 (1H, m CH(CH<sub>3</sub>)<sub>2</sub>), 1.54-1.26 (2H, m, CH<sub>2</sub><sup>*i*</sup>Pr), 0.79 (6H, q, J 6.0 Hz, CH(CH<sub>3</sub>)<sub>2</sub>); δ<sub>C</sub> (75 MHz); 142.9, 137.9, 131.2, 130.7, 129.2, 127.4, 62.6, 53.9, 44.9, 24.2, 22.6, 22.4, 20.9; *m/z* (CI) 315 [M+NH<sub>4</sub>]<sup>+</sup>, 189, 126, 124, 86 (Found: [M+NH<sub>4</sub>]<sup>+</sup>, 315.1749. C<sub>15</sub>H<sub>23</sub>NO<sub>3</sub>S requires [M+NH<sub>4</sub>]<sup>+</sup>, 315.1742) (Found: C, 60.58; H, 7.87; N, 4.68. C<sub>15</sub>H<sub>23</sub>NO<sub>3</sub>S requires C, 60.58; H, 7.79; N, 4.71%).

#### **(E)-4-(Toluene-4-sulfonamido)oct-2-en-1-ol**

DIBAL-H (39.2 ml of a 1 M in CH<sub>2</sub>Cl<sub>2</sub> solution, 39.2 mmol, 3.6 equiv) was added dropwise to a solution of (E)-ethyl 4-(toluene-4-sulfonamido)oct-2-enoate (3.70 g, 10.9 mmol, 1.0 equiv) in CH<sub>2</sub>Cl<sub>2</sub> (100 ml) at -78 °C with vigorous stirring. After 15 h the mixture was allowed to warm to rt. After a further 2 h the reaction was quenched with EtOAc (10 ml) and poured into Rochelle's salt (250 ml of a 50% saturated aqueous solution) and the resulting two phase mixture stirred until both layers became clear (1 h). The aqueous layer was extracted with EtOAc (2 x 150 ml) and the combined organic extracts washed with brine (200 ml) and dried (Na<sub>2</sub>SO<sub>4</sub>). Concentration under reduced pressure gave (E)-4-(toluene-4-sulfonamido)oct-2-enol (3.21 g, 99%) as an oil, which upon trituration with Et<sub>2</sub>O yielded a white powder; mp 55–59 °C (Et<sub>2</sub>O); R<sub>f</sub> 0.20 (50% EtOAc–petrol);

$\nu_{\max}$  (film) 3055, 1987, 2306, 1421, 1265, 1160, 897, 737  $\text{cm}^{-1}$ ;  $\delta_{\text{H}}$  (300 MHz) 7.56 (2H, d, J 8.0 Hz, *ortho* Ts), 7.31 (2H, d, 8.0 Hz, *meta* Ts), 5.58 (1H, dt, J 16.0, 5.0 Hz,  $\text{CH}=\text{CHCH}_2$ ), 5.39 (1H, dd, J 16.0, 7.0 Hz,  $\text{CH}=\text{CHCH}_2$ ), 4.59 (1H, br s, NH), 3.96 (2H, d, J 5.0 Hz,  $\text{CH}_2\text{OH}$ ), 3.77 (1H, t, J 6.0 Hz,  $\text{CHNH}$ ), 2.44 (3H, s, Me of Ts), 1.48-1.43 (2H, m, OH and  $(\text{CH}_2)_2\text{CHH}$ ), 1.22 (5H, br s,  $(\text{CH}_2)_2\text{CHH}$ ), 0.85-0.83 (3H, m,  $\text{CH}_3(\text{CH}_2)_2$ );  $\delta_{\text{C}}$  (75 MHz) 143.3, 138.2, 131.0, 130.9, 129.5, 127.4, 62.7, 55.5, 35.4, 27.5, 22.3, 21.5, 13.9;  $m/z$  (CI) 315  $[\text{M}+\text{NH}_4]^+$ , (Found:  $[\text{M}+\text{NH}_4]^+$ , 315.1735.  $\text{C}_{15}\text{H}_{23}\text{NO}_3\text{S}$  requires  $[\text{M}+\text{NH}_4]^+$ , 315.1742) (Found: C, 60.60; H, 7.82; N, 4.52.  $\text{C}_{15}\text{H}_{23}\text{NO}_3\text{S}$  requires C, 60.58; H, 7.82; N, 4.71%).

### (+)-(S)-(E)-4-(4-Methylbenzylamino)pent-2-en-1-ol (6a)

Onto a solution of (-)-(S)-(E)-4-(toluene-4-sulfonamide)pent-2-en-1-ol (1.77 g, 6.94 mmol, 1.0 equiv), in THF (2 ml) at  $-78^\circ\text{C}$  was condensed  $\text{NH}_3(\text{l})$  (~50 ml) and freshly-cut sodium metal (1.11 g, 48.3 mmol, 7.0 equiv) added. After the sodium had dissolved (10 min) the reaction was quenched with MeOH (10 ml) until decolourisation was observed. The  $\text{NH}_3(\text{l})$  was then allowed to evaporate and the residue partitioned between  $\text{CH}_2\text{Cl}_2$  (50 ml) and  $\text{NaHCO}_3$  (50 ml). The organic layer was washed with  $\text{H}_2\text{O}$  (20 ml) and the aqueous phase extracted with 10:8:1  $\text{CHCl}_3$ :MeOH: $\text{NH}_4\text{OH}$  (3 x 10 ml). The combined organic extracts were dried ( $\text{Na}_2\text{SO}_4$ ) and concentrated under reduced pressure to give the crude amine (540 mg);  $\delta_{\text{H}}$  (300 MHz) 5.67-5.55 (2H, m,  $\text{CH}=\text{CH}$ ), 4.04-3.94 (2H, m,  $\text{CH}_2\text{OH}$ ), 3.43-3.39 (1H, m,  $\text{CHNH}_2$ ), 1.08 (3H, d, J 6.5 Hz,  $\text{CHCH}_3$ );  $\delta_{\text{C}}$  (75 MHz) 136.8, 128.6, 62.5, 48.6, 24.8. A portion of the resulting yellow solid (185 mg, 1.83 mmol, 1.0 equiv) was dissolved in MeOH (7 ml) containing activated 4Å MS. Tolualdehyde (240  $\mu\text{l}$ , 2.01 mmol, 1.1 equiv) was then added and the mixture stirred at rt. After 12 h the reaction was cooled to  $0^\circ\text{C}$  and  $\text{NaBH}_4$  (84.0 mg, 2.20 mmol, 1.2 equiv) added and the mixture warmed slowly to rt. After a further 1 h, the reaction was filtered and concentrated under reduced pressure. Chromatography (50% MeOH–EtOAc) gave the amine **6a** as a pale yellow oil (298 mg, 80%);  $R_f$  0.50 (50% MeOH–EtOAc);  $[\alpha]_{\text{D}}^{22} +20.0$  ( $c$  1.0,  $\text{CHCl}_3$ );  $\nu_{\max}$  (film)  $\text{cm}^{-1}$  3275, 2970, 2924, 1516, 1452, 1371, 1095, 1014, 974, 804;  $\delta_{\text{H}}$  (300 MHz) 7.20-7.12 (4H, m,  $\text{CH}_2\text{ArMe}$ ), 5.73 (1H, dt, J 15.0, 5.0 Hz,  $\text{C}=\text{CHCH}_2$ ), 5.61 (1H, dd, J 15.0, 7.0 Hz,  $\text{CHCH}=\text{C}$ ), 4.10-4.09 (2H, m,  $\text{CH}_2\text{OH}$ ), 3.75 (1H, d, J 13.0 Hz,  $\text{NCHH}$ ), 3.65 (1H, d, J 13.0 Hz,  $\text{NCHH}$ ), 3.29-3.24 (1H, m,  $\text{CHNH}$ ), 2.72 (2H, br, s, NH and OH), 2.34 (3H, s, Me of  $\text{CH}_2\text{ArMe}$ ), 1.19 (3H, d, J 6.0 Hz,  $\text{CHCH}_3$ );  $\delta_{\text{C}}$  (75 MHz) 136.9, 136.6, 134.7, 130.7, 129.2, 128.2, 62.6, 54.7, 51.0, 21.6, 21.1;  $m/z$  (CI) 206  $[\text{M}+\text{H}]^+$ , 190, 122, 105 (Found:  $[\text{M}+\text{NH}_4]^+$ , 206.1547.  $\text{C}_{13}\text{H}_9\text{NO}$  requires  $[\text{M}+\text{NH}_4]^+$ , 206.1545). *Elemental analysis failed twice due to the hygroscopic nature of the compound.*



**(-)-(S)-(E)-5-Methyl-4-(4-methylbenzylamino)hex-2-en-1-ol (6b)**

Onto a solution of (-)-(S)-(E)-5-methyl-4-(toluene-4-sulfonamide)hex-2-en-1-ol (3.50 g, 12.3 mmol, 1.0 equiv) in THF (10 ml) at -78 °C was condensed NH<sub>3</sub>(l) (~150 ml) and freshly cut sodium metal (1.70 g, 74.0 mmol, 7.0 equiv) then added. After the sodium had dissolved (10 min) the reaction was quenched with MeOH (50 ml) until the solution decolourised. The NH<sub>3</sub>(l) was then allowed to evaporate and the residue partitioned between 2:1 CHCl<sub>3</sub>:EtOH (20 ml) and H<sub>2</sub>O (20 ml). The aqueous phase was further extracted with 2:1 CHCl<sub>3</sub>:EtOH (5 x 25 ml) and the combined organic extracts washed with brine (50 ml) and dried (Na<sub>2</sub>SO<sub>4</sub>). After concentration under reduced pressure the resulting residue was passed through a short pad of silica (10:8:1 CHCl<sub>3</sub>:MeOH:NH<sub>3</sub>) and concentrated under reduced pressure to give the crude amine (1.05 g); δ<sub>H</sub> (300 MHz) 5.66-5.49 (2H, m, CH=CH), 3.99 (2H, d, J 5.0 Hz, CH<sub>2</sub>OH), 3.00 (1H, t, J 6.0 Hz, CHNH<sub>2</sub>), 2.65 (2H, br s, NH<sub>2</sub>), 1.59-1.49 (1H, m, CH(CH<sub>3</sub>)<sub>2</sub>), 0.81 (3H, d, J 7.5 Hz, CH(CH<sub>3</sub>)<sub>2</sub>), 0.79 (3H, d, J 7.5 Hz, CH(CH<sub>3</sub>)<sub>2</sub>); δ<sub>C</sub> (75 MHz) 131.1, 130.6, 62.2, 59.0, 33.7, 18.6, 18.5. A portion of this (240 mg, 1.86 mmol, 1.0 equiv) was dissolved in MeOH (7 ml) containing activated 4Å MS. Tolualdehyde (440 µl, 3.70 mmol, 2.0 equiv) was then added and the mixture stirred at rt. After 12 h the reaction was cooled to 0 °C and NaBH<sub>4</sub> (170 mg, 4.50 mmol, 2.4 equiv) added and the mixture warmed slowly to rt. After a further 1 h, the reaction was filtered, NaOH (2 M; 10 ml) added and the mixture extracted with CH<sub>2</sub>Cl<sub>2</sub> (2 x 10 ml). The combined organic extracts were washed with brine (20 ml) and dried (Na<sub>2</sub>SO<sub>4</sub>). Chromatography (5-10% MeOH-CH<sub>2</sub>Cl<sub>2</sub>) gave the *amine 6b* (330 mg, 53%); R<sub>f</sub> 0.53 (50% MeOH-EtOAc); [α]<sub>D</sub><sup>28</sup> -32.0 (c 0.5, CHCl<sub>3</sub>); ν<sub>max</sub> (film) 3307, 2956, 2870, 1513, 1452, 1367, 1088, 976, 806 cm<sup>-1</sup>; δ<sub>H</sub> (300 MHz) 7.21 (2H, d, J 8.0 Hz, *ortho* CH<sub>2</sub>ArMe), 7.24 (2H, d, J 8.0 Hz, *meta* CH<sub>2</sub>ArMe), 5.72 (1H, dt, J 15.5, 5.0 Hz, C=CHCH<sub>2</sub>), 5.54 (1H, dd, J 15.5, 8.0 Hz, CHCH=C), 4.15 (2H, d, J 5.0 Hz, CH<sub>2</sub>OH), 3.82 (1H, d, J 13.0 Hz, NCHH), 3.60 (1H, d, J 13.0 Hz, NCHH), 2.85-2.81 (2H, m, CHNH and NH), 2.35 (3H, s, Me of CH<sub>2</sub>ArMe), 1.77-1.71 (1H, m, CH(CH<sub>3</sub>)<sub>2</sub>), 0.93 (3H, d, J 7.0 Hz, CH(CH<sub>3</sub>)<sub>2</sub>), 0.90 (3H, d, J 7.0 Hz, CH(CH<sub>3</sub>)<sub>2</sub>); δ<sub>C</sub> (75 MHz) 137.2, 136.5, 132.9, 131.8, 129.1, 128.2, 65.5, 62.7, 51.0, 32.2, 21.2, 19.5, 18.5; *m/z* (CI) 234 [M+H]<sup>+</sup>, 216, 190, 122, 105 (Found: [M+H]<sup>+</sup>, 234.1860. C<sub>15</sub>H<sub>23</sub>NO requires [M+H]<sup>+</sup>, 234.1858). *Elemental analysis failed twice due to the hygroscopic nature of the compound.*

**(+)-(S)-(E)-6-Methyl-4-(4-methylbenzylamino)hept-2-en-1-ol (6c)**

Onto a solution of (-)-(S)-(E)-6-methyl-4-(toluene-4-sulfonamido)hept-2-en-1-ol (3.00 g, 10.1 mmol, 1.0 equiv) in THF (5 ml) at -78 °C was condensed NH<sub>3</sub>(l) (~75 ml) and freshly cut sodium metal (1.39 g, 60.6 mmol, 7.0 equiv) added. After the sodium had dissolved (10 min) the reaction was quenched with solid NaOAc until the solution decolourised. The NH<sub>3</sub>(l) was then allowed to evaporate and the residue partitioned between 2:1 CHCl<sub>3</sub>:EtOH (20 ml) and H<sub>2</sub>O (20 ml). The

aqueous phase was extracted with 2:1 CHCl<sub>3</sub>:EtOH (5 x 25 ml) and the combined organic extracts washed with brine (50 ml) and dried (Na<sub>2</sub>SO<sub>4</sub>). After concentration under reduced pressure the resulting residue was passed through a short pad of silica (10:8:1 CHCl<sub>3</sub>:MeOH:NH<sub>3</sub>) and concentrated under reduced pressure to give the crude amine (1.05 g);  $\delta_{\text{H}}$  (300 MHz) 5.76 (1H, dt, J 15.5, 5.0 Hz, C=CHCH<sub>2</sub>), 5.64 (1H, dd, J 15.5, 7.0 Hz, CH=CHCH<sub>2</sub>), 4.15 (2H, d, J 5.0 Hz, CH<sub>2</sub>OH), 3.41 (1H, q, J 7.0 Hz, CHNH<sub>2</sub>), 1.71-1.62 (4H, m, NH<sub>2</sub> and CH<sub>2</sub>*i*Pr), 1.30 (1H, t, J 7.5 Hz, CH(CH<sub>3</sub>)<sub>2</sub>), (6H, d, J 6.5 Hz, CH(CH<sub>3</sub>)<sub>2</sub>);  $\delta_{\text{C}}$  (75 MHz) 137.2, 128.3, 63.2, 51.3, 47.1, 24.9, 22.7 (2 signals). A portion of this (250 mg, 1.75 mmol, 1.0 equiv) was dissolved in MeOH (7 ml) containing activated 4Å MS. Tolualdehyde (230  $\mu$ l, 1.93 mmol, 1.1 equiv) was then added and the mixture stirred at rt. After 12 h the reaction was cooled to 0 °C and NaBH<sub>4</sub> (106 mg, 2.80 mmol, 1.6 equiv) added and the mixture warmed slowly to rt. After a further 1 h, the reaction was filtered, NaOH (1 M; 10 ml) added and the mixture extracted with CH<sub>2</sub>Cl<sub>2</sub> (2 x 10 ml). The combined organic extracts were washed with brine (20 ml) and dried (Na<sub>2</sub>SO<sub>4</sub>). Chromatography (10% MeOH–CH<sub>2</sub>Cl<sub>2</sub>) gave the *amine 6c* (453 mg, 72%) as a pale yellow oil;  $R_{\text{f}}$  0.57 (10% MeOH–CH<sub>2</sub>Cl<sub>2</sub>);  $[\alpha]_{\text{D}}^{26}$  +4.0 (*c* 1.0, CHCl<sub>3</sub>);  $\nu_{\text{max}}$  (film) 3255, 1951, 2912, 1566, 1516, 1254, 1319, 1089, 1025, 972, 804 cm<sup>-1</sup>;  $\delta_{\text{H}}$  (300 MHz) 7.19 (2H, d, J 8.0 Hz, *ortho* CH<sub>2</sub>ArMe), 7.13 (2H, d, J 8.0 Hz, *meta* CH<sub>2</sub>ArMe), 5.73 (1H, dt, J 15.0, 5.0 Hz, C=CHCH<sub>2</sub>), 5.51 (1H, dd, J 15.0, 8.0 Hz, CH=CHCH<sub>2</sub>), 4.13 (2H, d, J 5.0 Hz, CH<sub>2</sub>OH), 3.79 (1H, d, J 13.0 Hz, NCHH), 3.61 (1H, d, J 13.0 Hz, NCHH), 3.14 (1H, td, J 8.0, 8.0 Hz, CHN), 2.34 (3H, s, Me of CH<sub>2</sub>ArMe), 1.65-1.58 (1H, m, CH(CH<sub>3</sub>)<sub>2</sub>), 1.38-1.33 (2H, m, CH<sub>2</sub>*i*Pr), 0.86 (6H, d, J 6.5 Hz, CH(CH<sub>3</sub>)<sub>2</sub>);  $\delta_{\text{C}}$  (75 MHz) 137.0, 136.6, 133.8, 131.8, 129.1, 128.2, 62.7, 57.9, 50.9, 44.9, 24.7, 23.9, 23.1, 21.1;  $m/z$  (CI) 248 [M+H]<sup>+</sup>, 190, 122 (Found: [M+H]<sup>+</sup>, 248.2007. C<sub>16</sub>H<sub>25</sub>NO requires [M+NH]<sup>+</sup>, 248.2014). *Elemental analysis failed twice due to the hygroscopic nature of the compound.*

#### (*E*)-4-(4-Methylbenzylamino)oct-2-en-1-ol (6d)

Onto a solution of (*E*)-4-(toluene-4-sulfonamido)oct-2-en-1-ol (90.0 mg, 0.231 mmol, 1.0 equiv) in THF (2 ml) at –78 °C was condensed NH<sub>3</sub>(l) (~15 ml) and freshly cut sodium metal (37.0 mg, 1.61 mmol, 7.0 equiv) then added. After the sodium had dissolved (10 min) the reaction was quenched with MeOH (0.5 ml) until the solution decolourised. The NH<sub>3</sub>(l) was then allowed to evaporate and the residue extracted with CHCl<sub>3</sub> (5 x 5 ml), filtered through celite and dried (Na<sub>2</sub>SO<sub>4</sub>). Evaporation under reduced pressure gave the crude amine (30.1 mg);  $\delta_{\text{H}}$  (300 MHz) 5.74-5.67 (2H, m, CH=CH), 4.14 (2H, d, J 5.0 Hz, CH<sub>2</sub>OH), 3.32 (1H, t, J 6.5 Hz, CHNH<sub>2</sub>), 1.76-1.53 (2H, m, CHCH<sub>2</sub>), 1.47-1.21 (4H, m, CH(CH<sub>2</sub>)<sub>2</sub>), 0.91-0.83 (3H, m, (CH<sub>2</sub>)<sub>2</sub>CH<sub>3</sub>);  $\delta_{\text{C}}$  (75 MHz) 135.6, 127.4, 62.6, 53.7, 35.7, 28.6, 23.0, 14.4. This was then dissolved in MeOH (1 ml) containing activated 4Å MS. Tolualdehyde (30.0  $\mu$ l, 0.230 mmol, 1.1 equiv) was then added and the mixture stirred at rt. After

12 h the reaction was cooled to 0 °C and NaBH<sub>4</sub> (18.1 mg, 0.460 mmol, 2.0 equiv added and the mixture warmed slowly to rt. After a further 1 h, the reaction was filtered, NaOH (2 M; 5 ml) added and the mixture extracted with CH<sub>2</sub>Cl<sub>2</sub> (2 x 5 ml). The combined organic extracts were washed with brine (20 ml) and dried (Na<sub>2</sub>SO<sub>4</sub>). Chromatography (5-10% MeOH–CH<sub>2</sub>Cl<sub>2</sub>) gave the *amine 6d* (40.0 mg, 0.162 mmol, 70%) as a pale yellow oil; *R<sub>f</sub>* 0.50 (50% MeOH–EtOAc);  $\nu_{\max}$  (film) 2954, 2927, 2858, 1514, 1456, 1375, 1090, 974, 806 cm<sup>-1</sup>;  $\delta_{\text{H}}$  (300 MHz) 7.21 (2H, d, J 8.0 Hz, *ortho* CH<sub>2</sub>ArMe), 7.14 (2H, d, J 8.0 Hz, *meta* CH<sub>2</sub>ArMe), 5.74 (1H, dt, J 15.5, 5.0 Hz, C=CHCH<sub>2</sub>), 5.54 (1H, dd, J 15.5, 8.0 Hz, CHCH=C), 4.15 (2H, d, J 5.0 Hz, CH<sub>2</sub>OH,) 3.79 (1H, d, J 13.0 Hz, NCHH), 3.63 (1H, d, J 13.0 Hz, NCHH), 3.11-3.04 (1H, m, CHNH), 2.35 (3H, s, Me of CH<sub>2</sub>ArMe), 1.54-1.42 (2H, m, CH<sub>2</sub>(CH<sub>2</sub>)<sub>2</sub>CH<sub>3</sub>), 1.28-1.27 (4H, m, CH<sub>2</sub>(CH<sub>2</sub>)<sub>2</sub>CH<sub>3</sub>), 0.89 (3H, t, J 6.0 Hz, CH<sub>2</sub>(CH<sub>2</sub>)<sub>2</sub>CH<sub>3</sub>);  $\delta_{\text{C}}$  (75 MHz); 137.0, 136.6, 134.0, 131.7, 129.1, 128.5, 63.0, 59.9, 50.9, 35.3, 28.1, 22.7, 21.2, 14.1 *m/z* (CI) 248 [M+H]<sup>+</sup>, 190, 122, 105, 52 (Found: [M+H]<sup>+</sup>, 248.2013. C<sub>16</sub>H<sub>25</sub>NO requires [M+H]<sup>+</sup>, 234.2014). *Elemental analysis failed twice due to the hygroscopic nature of the compound.*

#### **(–)-(S)-(E)-4-{(4-Methylbenzyl)[2-(toluene-4-sulfonyl)acetyl]amino}pent-2-enol**

PyBOP (177 mg, 0.340 mmol, 1.0 equiv) was added to a solution of amine **6a** (58.0 mg, 0.280 mmol, 1.0 equiv), TsCH<sub>2</sub>CO<sub>2</sub>H (72.8 mg, 0.340 mmol, 1.0 equiv) and Hünig's base (16.0 µl, 0.920 mmol, 3.3 equiv) in CH<sub>2</sub>Cl<sub>2</sub> (2 ml). After 12 h the reaction was quenched with saturated aqueous NH<sub>4</sub>Cl (1 ml) and extracted with CH<sub>2</sub>Cl<sub>2</sub> (2 x 5 ml). The combined organic extracts were concentrated under reduced pressure and dissolved in THF (1 ml) and NaOH (2 M; 1 ml). After stirring at rt for 1h the mixture was extracted with CH<sub>2</sub>Cl<sub>2</sub> (3 x 5 ml) and dried (Na<sub>2</sub>SO<sub>4</sub>). Concentration under reduced pressure and chromatography (5% MeOH–CH<sub>2</sub>Cl<sub>2</sub>) yielded (–)-(S)-(E)-4-{(4-methylbenzyl)-[2-(toluene-4-sulfonyl)acetyl]amino}pent-2-enol (103 mg, 92%) as a colourless oil; *R<sub>f</sub>* 0.50 (5% MeOH–CH<sub>2</sub>Cl<sub>2</sub>);  $[\alpha]_{\text{D}}^{25}$  –53.3 (*c* 1.0, CHCl<sub>3</sub>);  $\nu_{\max}$  (film) 3435, 1643, 1439, 1321, 1153, 1001 cm<sup>-1</sup>;  $\delta_{\text{H}}$  (300 MHz) 7.83-7.77 (2H, m, *ortho* Ts), 7.37-7.28 (2H, m, *meta* Ts), 7.14 (2H, d, J 8.0 Hz, *ortho* CH<sub>2</sub>ArMe), 7.04 (2H, d, J 8.0 Hz, *meta* CH<sub>2</sub>ArMe), 5.83-5.63 (2H, m, CH=CH), 5.20 (0.67H, t, J 5.0 Hz, CHN rotamer 1), 4.81-4.79 (0.33 H, m, CHN rotamer 2), 4.69 (0.67 H, d, J 18.0 Hz, CHHTs rotamer 1), 4.57 (1H, d, J 18.0 Hz, CHHTs rotamer 1 and CHHTs rotamer 2), 4.43 (0.33H, d, J 14.0 Hz, CHHArMe rotamer 2), 4.50 (0.33H, d, J 15.0 Hz, CHHTs rotamer 2), 4.28 (0.33 H, d, J 14.0 Hz, CHHArMe rotamer 2), 4.01-4.13 (3.34H, CH<sub>2</sub>OH and CH<sub>2</sub>ArMe rotamer 1), 2.45 (3H, s, Me of Ts), 2.34 (3H, s, Me of CH<sub>2</sub>Ar), 1.32 (0.99H, d, J 7.0 Hz, CHCH<sub>3</sub> rotamer 1), 1.22 (2.01H, d, J 7.0 Hz, CHCH<sub>3</sub> rotamer 1);  $\delta_{\text{C}}$  (75 MHz) 162.5, 162.1, 145.3, 137.4, 136.5, 136.1, 136.0, 135.2, 134.2, 131.5, 131.2, 130.8, 130.4, 129.8, 129.7, 129.4, 129.0, 128.6, 127.5, 62.9, 62.6, 60.8, 60.4, 51.4, 47.3, 46.1, 44.2, 21.8, 21.2, 19.0, 17.1; *m/z* (CI) 419

$[M+NH_4]^+$ , 402  $[M+H]^+$ , 190 (Found:  $[M+NH_4]^+$ , 419.2000.  $C_{22}H_{27}NO_4S$  requires  $[M+NH_4]^+$ , 419.2005) (Found: C, 65.72; H, 6.49; N, 3.22.  $C_{22}H_{27}NO_4S$  requires C, 65.81; H, 6.78; N, 3.49%).

**(–)-(S)-(E)-5-Methyl-4-{(4-methylbenzyl)[2-(toluene-4-sulfonyl)acetyl]amino}hex-2-enol**

PyBOP (146 mg, 0.274 mmol, 1.2 equiv) was added to a solution of amine **6b** (53.0 mg, 0.228 mmol, 1.0 equiv),  $TsCH_2CO_2H$  (58.6 mg, 0.274 mmol, 1.2 equiv) and Hünig's base (131  $\mu$ l, 0.752 mmol, 3.3 equiv) in  $CH_2Cl_2$  (2 ml). After 12 h the reaction was quenched with saturated aqueous  $NH_4Cl$  (4 ml) and extracted with  $CH_2Cl_2$  (3 x 5 ml). The combined organic extracts were concentrated under reduced pressure and dissolved in THF (2 ml) and NaOH (2 M; 2 ml). After stirring at rt for 1h the mixture was extracted with  $CH_2Cl_2$  (3 x 5 ml) and dried ( $Na_2SO_4$ ). Concentration under reduced pressure and chromatography (80%  $Et_2O$ –petrol) yielded (–)-(S)-(E)-5-methyl-4-{(4-methylbenzyl)[2-(toluene-4-sulfonyl)acetyl]amino}hex-2-enol (75.0 mg, 76%) as a colourless oil;  $R_f$  0.57 (50%  $EtOAc$ –petrol);  $[\alpha]_D^{24}$   $-22.2$  ( $c$  1.0,  $CHCl_3$ );  $\nu_{max}$  (film) 3431, 2960, 1643, 1429, 1321, 1155, 1086, 1018, 974, 800  $cm^{-1}$ ;  $\delta_H$  (300 MHz) 7.73-7.66 (2H, m, *ortho* Ts), 7.19-7.18 (2H, m, *meta* Ts), 7.06-6.93 (4H, m,  $CH_2ArMe$ ), 5.80 (0.2H, dt, J 16.0 Hz, 4.0 Hz,  $CH=CHCH_2$  rotamer 2), 5.68 (0.8H, dt, J 15.0, 5.0 Hz, H-3,  $CH=CHCH_2$  rotamer 1), 5.51-5.43 (1H, m,  $CH=CHCH_2$ ), 4.82 (0.8H, d, J 18.0 Hz,  $CHHTs$  rotamer 1), 4.67 (0.2H, d, J 15.0 Hz,  $CHHTs$  rotamer 2), 4.49 (0.8H, d, J, 18.0 Hz,  $CHHTs$  rotamer 1), 4.46-4.39 (0.4H, m,  $CHHTs$  rotamer 2 and  $CHHArMe$  rotamer 2), 4.17 (0.2H, d, J 15.0 Hz,  $CHHArMe$  rotamer 2), 4.07 (0.8H, d, J 14.0 Hz,  $CHHArMe$  rotamer 1), 3.89-3.85 (2.8H, m,  $CHHArMe$  rotamer 1 and CHN), 2.36 (3H, s, Me of  $CH_2ArMe$ ), 2.25 (3H, s, Me of Ts), 2.15-1.90 (2H, m,  $CH_2OH$ ), 1.24-1.08 (1H, m,  $CH(CH_3)_2$ ), 0.94 (2.4H, d, J 6.0 Hz,  $CH(CH_3)_2$  rotamer 1), 0.88 (0.6H, d, J 6.0 Hz,  $CH(CH_3)_2$  rotamer 2), 0.81 (3H, d, J, 6.0 Hz,  $CH(CH_3)_2$  rotamer 1 and rotamer 2);  $\delta_C$  (75 MHz) 162.3, 145.1, 137.5, 136.0, 134.4, 134.0, 129.7, 129.5, 128.8, 128.6, 128.5, 128.1, 127.9, 126.3, 64.0, 62.8, 60.9, 48.8, 30.3, 21.7, 21.0, 20.0, 19.4;  $m/z$  (CI) 447  $[M+NH_4]^+$ , 430  $[M+H]^+$ , 412, 276, 188, 174 (Found:  $[M+NH_4]^+$ , 430.2049.  $C_{24}H_{31}NO_4S$  requires  $[M+NH_4]^+$ , 430.2052).

**(E)-4-{(4-methylbenzyl)[(2-toluene-4-sulfonyl)acetyl]amino}oct-2-enol**

PyBOP (146 mg, 0.280 mmol, 2.0 equiv) was added to a solution of amine **6d** (34.0 mg, 0.140 mmol, 1.0 equiv),  $TsCH_2CO_2H$  (59.9 mg, 0.280 mmol, 2.0 equiv) and Hünig's base (120  $\mu$ l, 0.770 mmol, 5.5 equiv) in  $CH_2Cl_2$  (1 ml). After 12 h the reaction was quenched with saturated aqueous  $NH_4Cl$  (1 ml) and extracted with  $CH_2Cl_2$  (2 x 5 ml). The combined organic extracts were concentrated under reduced pressure and dissolved in THF (1 ml) and NaOH (2 M; 1 ml). After stirring at rt for 1h the mixture was extracted with  $CH_2Cl_2$  (3 x 5 ml) and dried ( $Na_2SO_4$ ). Concentration under reduced pressure and chromatography (50%  $EtOAc$ –petrol) yielded (E)-4-{(4-

methylbenzyl)[(2-toluene-4-sulfonyl)acetyl]amino}oct-2-enol (45.2 mg, 72%) as a colourless oil;  $R_f$  0.25 (50% EtOAc–petrol);  $\nu_{\max}$  (film) 3458, 2953, 2929, 2249, 1641, 1429, 1321, 1155, 1086, 1018, 976, 910, 810, 731  $\text{cm}^{-1}$ ;  $\delta_{\text{H}}$  (300 MHz) 7.72 (2H, d, J 8.0 Hz, *ortho* Ts), 7.36–7.34 (2H, m, *meta* Ts), 7.15 (2H, d, J 8.0 Hz, *ortho* ArMe), 7.04 (2H, d, J 8.0 Hz, *meta* ArMe), 5.82–5.77 (1H, m, CH=CHCH<sub>2</sub>), 5.62 (1H, dd, J 15.0, 7.0 Hz, CH=CHCH<sub>2</sub>), 4.95–4.93 (0.7 H, m, CHN rotamer 1), 4.73 (0.7 H, d, J 18.0 Hz, CHHTs rotamer 1), 4.61 (0.7 H, d, J 18.0 Hz, CHHTs rotamer 1), 4.55–4.02 (5H, m, CH<sub>2</sub>Ts rotamer 2, 2H CH<sub>2</sub>ArMe, 2H CH<sub>2</sub>OH and CHN rotamer 2), 2.46 (3H, s, Me of CH<sub>2</sub>ArMe), 2.34 (3H, s, Me of Ts), 1.61–0.84 (9H, m, (CH<sub>2</sub>)<sub>3</sub>CH<sub>3</sub>);  $\delta_{\text{C}}$  (75 MHz) 162.4, 145.2, 137.4, 136.6, 136.0, 135.2, 134.1, 132.8, 132.2, 129.6, 129.3, 128.9, 128.6, 126.1, 62.9, 62.7, 60.9, 60.4, 60.1, 56.7, 48.0, 46.3, 32.6, 31.6, 28.6, 28.3, 22.5, 21.8, 21.3, 14.0;  $m/z$  (CI) 444 [M+H]<sup>+</sup>, 290 (Found: [M+H]<sup>+</sup>, 444.2201. C<sub>25</sub>H<sub>33</sub>NO<sub>4</sub>S requires [M+H]<sup>+</sup>, 444.2209) (Found: C, 67.55; H, 7.29; N, 3.07. C<sub>25</sub>H<sub>33</sub>NO<sub>4</sub>S requires C, 67.69; H, 7.50; N, 3.16%).

**(–)-(S)-(E)-Carbonic acid methyl ester 4-{(4-methylbenzyl)-[2-(toluene-4-sulfonyl)-acetyl]amino}pent-2-enyl (7a)**

To a solution of (–)-(S)-(E)-4-{(4-methylbenzyl)[2-(toluene-4-sulfonyl)acetyl]amino}pent-2-enol (87.0 mg, 0.220 mmol, 1.0 equiv) in CH<sub>2</sub>Cl<sub>2</sub> (2 ml) at 0 °C was added pyridine (34.5  $\mu\text{l}$ , 0.660 mmol, 3.0 equiv), methyl chloroformate (50.1  $\mu\text{l}$ , 0.660 mmol, 3.0 equiv) and DMAP (1.3 mg, 0.011 mmol, 0.05 equiv). The reaction mixture was warmed to rt. and after 1 h was diluted with CH<sub>2</sub>Cl<sub>2</sub> (5 ml) then quenched by addition of saturated aqueous NH<sub>4</sub>Cl (5 ml). The organic layer was washed with brine (5 ml) and dried (Na<sub>2</sub>SO<sub>4</sub>). Concentration under reduced pressure and chromatography (30% EtOAc–petrol) gave the *carbonate* **7a** (95.4 mg, 95%) as a colourless oil;  $R_f$  0.83 (5% MeOH–CH<sub>2</sub>Cl<sub>2</sub>);  $[\alpha]_{\text{D}}^{22}$  –72.0 (*c* 0.5, CHCl<sub>3</sub>);  $\nu_{\max}$  (film) 2958, 1750, 1645, 1441, 1265, 1160, 794  $\text{cm}^{-1}$ ;  $\delta_{\text{H}}$  (300 MHz) 7.81–7.76 (2H, m, *ortho* Ts), 7.38–7.32 (2H, m, *meta* Ts), 7.17–7.03 (4H, m, CH<sub>2</sub>ArMe), 5.77–5.71 (2H, m, CH=CH), 5.22–5.20 (0.86 H, m, CHN rotamer 1), 4.74–4.72 (0.14H, m, CHN rotamer 2), 4.71 (1H, d, J 18.5 Hz, CHHTs), 4.59–4.51 (2.86 H, m, CH<sub>2</sub>OH and CHHTs rotamer 1), 4.38 (0.14 H, d, J 14.0 Hz, CHHArMe rotamer 2), 4.27 (0.14 H, d, J 14.0 Hz, CHHArMe rotamer 2), 4.24 (0.14 H, d, J 15.0 Hz, CHHTs rotamer 2), 4.10 (0.86 H, d, J 14.0 Hz, CHHArMe rotamer 1), 4.03 (0.86 H, d, J 14.0 Hz CHHArMe rotamer 1), 3.81 (0.42H, s, OCO<sub>2</sub>CH<sub>3</sub> rotamer 2), 3.78 (2.58H, s, OCO<sub>2</sub>CH<sub>3</sub> rotamer 1), 2.45 (3H, s, Me of Ts), 2.35 (3H, s, Me of CH<sub>2</sub>ArMe), 1.33 (0.42H, d, J 7.0 Hz, CHCH<sub>3</sub> rotamer 2), 1.22 (2.58H, d, J 7.0 Hz, CHCH<sub>3</sub> rotamer 1);  $\delta_{\text{C}}$  (75 MHz) 162.5, 162.0, 155.5, 145.2, 137.4, 136.5, 136.0, 135.8, 135.0, 134.6, 134.4, 134.0, 129.8, 129.0, 128.6, 127.4, 125.8, 125.5, 67.6, 67.3, 60.8, 60.4, 55.1, 54.9, 51.3, 45.9, 21.8, 21.1, 18.6, 16.9;  $m/z$  (CI) 477 [M+NH<sub>4</sub>]<sup>+</sup>, 460 [M+H]<sup>+</sup>, 384, 306, 230, 174 (Found: [M+NH<sub>4</sub>]<sup>+</sup>, 460.1792.

C<sub>24</sub>H<sub>29</sub>N<sub>1</sub>O<sub>6</sub>S<sub>1</sub> requires [M+NH<sub>4</sub>]<sup>+</sup>, 460.1794) (Found: C, 62.80; H, 6.23; N, 3.05. C<sub>24</sub>H<sub>29</sub>N<sub>1</sub>O<sub>6</sub>S<sub>1</sub> requires C, 62.73; H, 6.36; N, 3.05%).

**(–)-(S)-(E)-Carbonic acid methyl ester 5-methyl-4-[(4-methylbenzyl)-[2-(toluene-4-sulfonyl)acetyl]amino]hex-2-enyl ester (7b)**

To a solution of (–)-(S)-(E)-5-methyl-4-[(4-methylbenzyl)[2-(toluene-4-sulfonyl)acetyl]amino]hex-2-enol (50.0 mg, 0.117 mmol, 1.0 equiv) in CH<sub>2</sub>Cl<sub>2</sub> (2 ml) at 0 °C was added pyridine (30.6 μl, 0.585 mmol, 5.0 equiv), methyl chloroformate (36.1 μl, 0.468 mmol, 4.0 equiv) and DMAP (1.4 mg, 0.012 mmol, 0.1 equiv). The reaction mixture was warmed to rt. and after 1 h was diluted with CH<sub>2</sub>Cl<sub>2</sub> (5 ml) then quenched by addition of saturated aqueous NH<sub>4</sub>Cl (5 ml). The organic layer was washed with brine (5 ml) and dried (Na<sub>2</sub>SO<sub>4</sub>). Concentration under reduced pressure and chromatography (30% EtOAc–petrol) gave the *carbonate* **7b** (54.1 mg, 95%) as a colourless oil; R<sub>f</sub> 0.80 (50% EtOAc–petrol); [α]<sub>D</sub><sup>22</sup> –3.0 (c 4.0, CHCl<sub>3</sub>); ν<sub>max</sub> (film) 2958, 1749, 1647, 1443, 1323, 1269, 1155, 1086, 951, 914, 795, 731 cm<sup>-1</sup>; δ<sub>H</sub> (300 MHz) 7.83 (0.24H, d, J 8.0 Hz, *ortho* Ts rotamer 2), 7.76 (1.76H, d, J 8.0 Hz, *ortho* Ts rotamer 1), 7.28-7.40 (2H, *meta* Ts rotamer 1 and rotamer 2), 7.13 (2H, d, J 8.0 Hz, *ortho* CH<sub>2</sub>ArMe), 7.02 (2H, d, J 8.0 Hz *meta* CH<sub>2</sub>ArMe), 5.90 (0.12H, dt, J 15.0, 6.0 Hz, CH=CHCH<sub>2</sub> rotamer 2), 5.72-5.62 (1.88H, m, CH=CH rotamer 1 and CH=CHCH<sub>2</sub> rotamer 2), 4.89 (0.88H, d, J 18.0 Hz, CHHTs rotamer 1), 4.66 (0.12H, d, J 16.0 Hz, CHHTs rotamer 2), 4.60 (0.88H, CHHTs rotamer 1), 4.51-4.43 (3.12H, m, CH<sub>2</sub>OCO<sub>2</sub>Me CHN and CHHTs rotamer 2), 4.28 (0.12H, d, J 12.0 Hz, CHHArMe rotamer 2), 4.23 (0.12H, d, J 12.0 Hz, CHHArMe rotamer 2), 4.14 (0.88H, d, J 14.0 Hz, CHHArMe rotamer 1), 3.93 (0.88H, d, J 14.0 Hz, CHHArMe rotamer 1), 3.74 (3H, s, OCO<sub>2</sub>OCH<sub>3</sub>), 2.45 (3H, s, Me of Ts), 2.34 (3H, s, Me of CH<sub>2</sub>ArMe), 2.06-2.01 (1H, m, CH(CH<sub>3</sub>)<sub>2</sub>), 1.04 (2.64H, d, J 6.5 Hz, CH(CH<sub>3</sub>)<sub>2</sub> rotamer 1), 0.96 (0.36H, d, J 6.5 Hz, CH(CH<sub>3</sub>)<sub>2</sub> rotamer 2), 0.88 (3H, d, J 6.5 Hz, CH(CH<sub>3</sub>)<sub>2</sub>); δ<sub>C</sub> (75 MHz) 162.4, 155.4, 145.2, 237.4, 135.9, 135.7, 133.6, 132.2, 131.6, 130.2, 129.9, 129.7, 128.6, 127.8, 126.2, 67.4, 66.7, 64.2, 60.9, 60.8, 54.8, 48.9, 31.0, 29.9, 22.9, 22.2, 20.2, 19.7, 19.4; *m/z* (CI) 505 [M+NH<sub>4</sub>]<sup>+</sup>, 488 [M+H]<sup>+</sup>, 412, 334, 258, 189 (Found: [M+NH<sub>4</sub>]<sup>+</sup>, 505.2367. C<sub>26</sub>H<sub>33</sub>NO<sub>6</sub>S requires [M+NH<sub>4</sub>]<sup>+</sup>, 505.2372) (Found: C, 63.84; H, 6.62; N, 2.71. C<sub>26</sub>H<sub>33</sub>NO<sub>6</sub>S requires C, 64.04; H, 6.82; N, 2.87%).

**(–)-(S)-(E)-Carbonic acid methyl ester 6-methyl-4-[(4-methylbenzyl)[2-(toluene-4-sulfonyl)acetyl]amino]hept-2-enyl ester (7c)**

To a solution of TsCH<sub>2</sub>CO<sub>2</sub>H (501 mg, 2.34 mmol, 2.0 equiv), DCC (532 mg, 2.58 mmol, 2.2 equiv) and HOBt (348 mg, 2.58 mmol, 2.2 equiv) at 0 °C was added aminoalcohol **6c** (290 mg, 1.17 mmol 1.0 equiv) and the mixture warmed to rt. After 12 h the reaction was concentrated under reduced

pressure and the residue stirred in 10% NaOH:MeOH. After 12 h the mixture was extracted with CH<sub>2</sub>Cl<sub>2</sub> (4 x 40 ml), the combined organic extracts washed with H<sub>2</sub>O (20 ml), brine (20 ml) and dried (Na<sub>2</sub>SO<sub>4</sub>). Concentration under reduced pressure gave the crude amide (487 mg). A portion of this (430 mg, 0.970 mmol, 1.0 equiv) was dissolved in CH<sub>2</sub>Cl<sub>2</sub> (5 ml) and methylchloroformate (150 μl, 1.94 mmol, 2.0 equiv), pyridine (101 μl, 1.94 mmol, 2.0 equiv) and DMAP (1.2 mg, 0.091 mmol, 0.1 equiv) added. The reaction was warmed to room temperature and after 12 h quenched with saturated aqueous NH<sub>4</sub>Cl (10 ml). The mixture was extracted with CH<sub>2</sub>Cl<sub>2</sub> (3 x 15 ml) and the combined organic extracts washed with H<sub>2</sub>O (20 ml), brine (20 ml) and dried (Na<sub>2</sub>SO<sub>4</sub>). Evaporation under reduced pressure and chromatography (70% Et<sub>2</sub>O–petrol) gave the *carbonate 7c* (455 mg, 80%) as a colourless oil; R<sub>f</sub> 0.32 (30% EtOAc–petrol); [α]<sub>D</sub><sup>23</sup> –12.0 (c 1.0, CHCl<sub>3</sub>); ν<sub>max</sub> (film) 2929, 1749, 1649, 1443, 1267, 1155, 1086, 949, 793 cm<sup>-1</sup>; δ<sub>H</sub> (300 MHz) 7.81-7.74 (2H, m, *ortho* Ts), 7.36-7.30 (2H, m, *meta* Ts), 5.75-5.68 (2H, m, CH=CH), 5.03-5.02 (1H, m, CHN), 4.65-4.61 (2H, m, CH<sub>2</sub>Ts), 4.56-4.52 (2H, m, CH<sub>2</sub>ArMe), 4.12-4.02 (2H, m, CH<sub>2</sub>OCO<sub>2</sub>CH<sub>3</sub>), 3.82-3.73 (3H, m, OCO<sub>2</sub>CH<sub>3</sub>), 2.44 (3H, s, Me of Ts), 2.33 (3H, s, Me of CH<sub>2</sub>ArMe), 1.59-1.43 (3H, m, CH<sub>2</sub>*i*Pr and CH(CH<sub>3</sub>)<sub>2</sub>), 0.89 (3H, d, J 6.5 Hz, CH(CH<sub>3</sub>)<sub>2</sub>), 0.84 (3H, d, J 6.5 Hz, CH(CH<sub>3</sub>)<sub>2</sub>) (75 MHz) 162.4, 162.2, 155.5, 145.2, 137.4, 136.5, 135.9, 135.0, 133.9, 133.4, 133.0, 129.7, 129.6, 129.0, 128.6, 127.6, 127.2, 126.7, 67.6, 67.3, 60.9, 60.4, 58.0 54.8, 48.1, 46.2, 41.8, 40.8, 24.7, 23.2, 22.8, 21.8, 21.0; *m/z* (CI) 519 [M+NH<sub>4</sub>]<sup>+</sup>, 502 [M+H]<sup>+</sup>, 426, 348, 272 (Found: [M+NH<sub>4</sub>]<sup>+</sup>, 519.2508. C<sub>27</sub>H<sub>35</sub>NO<sub>6</sub>S requires [M+NH<sub>4</sub>]<sup>+</sup>, 519.2523) (Found: C, 64.83; H, 6.95; N, 2.66. C<sub>27</sub>H<sub>35</sub>NO<sub>6</sub>S requires C, 64.65; H, 7.03; N, 2.79%).

**(E)-Carbonic acid methyl ester 4-((4-methylbenzyl)[2-(toluene-4-sulfonyl)acetyl]amino)oct-2-enyl ester (7d)**

To a solution of (*E*)-4-((4-methylbenzyl)[2-(toluene-4-sulfonyl)acetyl]amino)oct-2-enol (43.0 mg, 0.0971 mmol, 1.0 equiv) in CH<sub>2</sub>Cl<sub>2</sub> (1 ml) at 0 °C was added pyridine (15.2 μl, 0.291 mmol, 3.0 equiv), methyl chloroformate (22.4 μl, 0.291 mmol, 3.0 equiv) and DMAP (1.2 mg, 0.01 mmol, 0.1 equiv). The reaction was warmed to rt and after 1 h was diluted with CH<sub>2</sub>Cl<sub>2</sub> and quenched by addition of saturated aqueous NH<sub>4</sub>Cl (5 ml). The organic layer was washed with brine (5 ml) and dried (Na<sub>2</sub>SO<sub>4</sub>). Concentration under reduced pressure and chromatography (30% EtOAc–petrol) gave the *carbonate 7d* (43.3 mg, 96%) as a colourless oil; R<sub>f</sub> 0.80 (50% EtOAc–petrol); ν<sub>max</sub> (film) 2956, 1749, 1649, 1443, 1267, 1155, 949, 793 cm<sup>-1</sup>; δ<sub>H</sub> (300 MHz) 7.81-7.76 (2H, m, *ortho* Ts) 7.38-7.33 (2H, m, *meta* Ts), 7.17-7.02 (4H, m, CH<sub>2</sub>ArMe), 5.76-5.75 (2H, m, CH=CH), 4.92-4.91 (0.74 H, m, CHN rotamer 1), 4.74-4.32 (4.26 H, m, CH<sub>2</sub>Ts, CH<sub>2</sub>ArMe rotamer 2 and CH<sub>2</sub>OCO<sub>2</sub>Me), 4.10 (0.74 H, d, J 14.0 Hz, CHHArMe rotamer 1), 4.03 (0.74 H, d, J 14.0 Hz, CHHArMe rotamer 1), 3.81 (0.78 H, s, OCO<sub>2</sub>CH<sub>3</sub> rotamer 2), 3.77 (2.22 H, s, OCO<sub>2</sub>CH<sub>3</sub> rotamer 1), 2.46 (3H, s, Me of Ts),

2.35-2.33 (3H, m, Me of CH<sub>2</sub>ArMe), 1.67-1.60 (2H, m, CH<sub>2</sub>(CH<sub>2</sub>)<sub>2</sub>CH<sub>3</sub>), 1.45-1.28 (4H, m, CH<sub>2</sub>(CH<sub>2</sub>)<sub>2</sub>CH<sub>3</sub>), 0.89-0.83 (3H, m, CH<sub>2</sub>(CH<sub>2</sub>)<sub>2</sub>CH<sub>3</sub>); δ<sub>C</sub> (75 MHz) 162.5, 162.3, 155.5, 145.2, 137.4, 136.6, 135.9, 133.8, 133.3, 133.1, 129.7, 128.9, 128.6, 127.9, 126.4, 126.1, 67.6, 67.4, 60.9, 60.4, 60.1, 56.8, 54.9, 48.1, 46.1, 32.5, 31.5, 28.5, 28.3, 22.5, 21.8, 21.1, 14.0, 13.9; *m/z* (CI) 519 [M+NH<sub>4</sub>]<sup>+</sup>, 502 [M+H]<sup>+</sup>, 376, 365, 348, 272, 225, 289, 174 (Found: [M+NH<sub>4</sub>]<sup>+</sup>, 519.2528. C<sub>27</sub>H<sub>35</sub>NO<sub>6</sub>S requires [M+NH<sub>4</sub>]<sup>+</sup>, 519.2529) (Found: C, 64.52; H, 7.15; N, 2.76. C<sub>27</sub>H<sub>35</sub>NO<sub>6</sub>S requires C, 64.65; H, 7.03; N, 2.79%).

**(3*S*, 4*R*, 5*S*)-5-Methyl-1-(4-methylbenzyl)-3-(toluene-4-sulfonyl)-4-vinylpyrrolidin-2-one and (3*R*, 4*S*, 5*S*)-5-Methyl-1-(4-methylbenzyl)-3-(toluene-4-sulfonyl)-4-vinylpyrrolidin-2-one (*cis*- and *trans*-8a)**

A solution of carbonate **7a** (40.0 mg, 8.72 x 10<sup>-2</sup> mmol, 1.0 equiv) in MeCN (1 ml) was added to a flask charged with Pd<sub>2</sub>(dba)<sub>3</sub> (4.1 mg, 0.004 mmol, 5.0 mol%) and TTMPP (23.4 mg, 0.044 mmol, 0.5 equiv) at rt. After stirring for 2 h the reaction was concentrated under reduced pressure. Chromatography (30% EtOAc–petrol) gave an inseparable 86:14 mixture of *cis*- and *trans*-  $\gamma$ -lactams **8a** (30.0 mg, 90%) as a colourless oil; *R*<sub>f</sub> 0.43 (30% EtOAc–petrol);  $\nu_{\max}$  (film) 1693, 1431, 1315, 1147, 1086, 1011, 935, 814, 737 cm<sup>-1</sup>; δ<sub>H</sub> (400 MHz) 7.89-7.82 (4H, m, *ortho* Ts of *cis* and *trans*), 7.37 (4H, d, *J* 8.0 Hz, *meta* Ts of *cis* and *trans*), 7.14 (2H, d, *J* 8.0 Hz, *ortho* CH<sub>2</sub>ArMe of *cis*), 7.10 (2H, d, *J* 8.0 Hz, *meta* CH<sub>2</sub>ArMe of *cis*), 7.09-7.08 (2H, m, *ortho* CH<sub>2</sub>ArMe *trans*), 7.05 (2H, d, *J* 8.0 Hz, *meta* CH<sub>2</sub>ArMe *trans*), 5.71 (2H, dt, *J* 17.0, 10.0 Hz, CH=CH<sub>2</sub> of *cis* and *trans*), 5.24 (2H, d, *J* 17.0 Hz, *trans* CH=CH<sub>2</sub> of *cis* and *trans*), 5.22 (1H, d, *J* 10.0 Hz, *cis* CH=CH<sub>2</sub> of *cis*), 5.16 (1H, d, *J* 10.0 Hz *cis* CH=CH<sub>2</sub> *trans*), 4.97 (1H, d, *J* 15.0 Hz, CHHArMe of *cis*), 4.88 (1H, d, *J* 15.0 Hz, CHHArMe *trans*), 3.97 (1H, d, *J* 15.0 Hz, CHHArMe *trans*), 3.91 (1H, d, *J* 15.0 Hz, CHHArMe of *cis*), 3.89-3.82 (3H, m, CHN of *cis* and CHTs, of *cis* and *trans*), 3.60 (1H, ddd, *J* 5.0, 7.5, 4.5 Hz, CHCH=CH<sub>2</sub> of *cis*), 3.23-3.10 (1H, m, NCH *trans*), 2.46 (6H, s, Me of CH<sub>2</sub>ArMe of *cis* and *trans*), 2.34 (3H, s, Me of Ts of *cis*), 2.31 (3H, s, Me of Ts *trans*), 1.27 (3H, d, *J* 6.5 Hz, NCHMe *trans*), 1.03 (3H, d, *J* 7.0 Hz, NCHMe of *cis*); δ<sub>C</sub> (100 MHz)<sup>8</sup> 165.1 (C=O), 145.2 (q Ar), 137.4 (q Ar), 135.0 (q Ar), 133.6 (CH=CH<sub>2</sub>), 132.3 (q Ar), 129.6 (*meta* Ts), 129.6 (ArH of CH<sub>2</sub>ArMe), 129.4 (*ortho* Ts), 127.7 (ArH of CH<sub>2</sub>ArMe), 119.4 (CH=CH<sub>2</sub>), 70.6 (CHTs), 54.1 (NCHMe), 44.2 (CH<sub>2</sub>ArMe), 21.8 (Me of CH<sub>2</sub>ArMe), 21.1 (Me of Ts), 15.3 (NCHMe); *m/z* (CI) 401 [M+NH<sub>4</sub>]<sup>+</sup>, 384 [M+H]<sup>+</sup>, 230 (Found: [M+H]<sup>+</sup>, 384.1647. C<sub>22</sub>H<sub>25</sub>NO<sub>3</sub>S requires [M+H]<sup>+</sup>, 384.1633)



**(3S, 4R, 5S)-5-Isopropyl-1-(4-methylbenzyl)-3-(toluene-4-sulfonyl)-4-vinylpyrrolidin-2-one and (3R, 4S, 5S)-5-isopropyl-1-(4-methylbenzyl)-3-(toluene-4-sulfonyl)-4-vinylpyrrolidin-2-one (*cis*- and *trans*-8b)**

A solution of carbonate **7b** (50.0 mg, 0.103 mmol, 1.0 equiv) in MeCN (1 ml) was added to a flask charged with Pd<sub>2</sub>(dba)<sub>3</sub> (4.6 mg, 0.005 mmol, 5.0 mol%) and TTMPP (26.6 mg, 0.052 mmol, 0.5 equiv) at rt. After stirring for 12 h the reaction was concentrated under reduced pressure. Chromatography (30% EtOAc–petrol) gave an inseparable 67:33 mixture of *cis*- and *trans*-  $\gamma$ -lactams **8b** (31.9 mg, 78%) as a colourless oil; *R<sub>f</sub>* 0.40 (30% EtOAc–petrol);  $\nu_{\text{max}}$  1695, 1435, 1319, 1147, 1086, 812 (film) cm<sup>-1</sup>;  $\delta_{\text{H}}$  (400 MHz) 7.90 (4H, d, *J* 8.0 Hz, *ortho* Ts of *cis* and *trans*), 7.38 (4H, d, *J* 8.0 Hz, *meta* Ts of *cis* and *trans*), 7.10 (2H, d, *J* 8.0 Hz *ortho* CH<sub>2</sub>ArMe of *cis*), 7.09 (2H, d, *J* 8.0 Hz, *ortho* CH<sub>2</sub>ArMe *trans*), 7.05 (2H, d, *J* 8.0 Hz, *meta* CH<sub>2</sub>ArMe *trans*), 6.95 (2H, d, *J* 8.0 Hz, *meta* CH<sub>2</sub>ArMe of *cis*), 5.85 (1H, ddd, *J* 17.0, 10.0, 9.0 Hz, CH=CH<sub>2</sub> of *cis*), 5.72 (1H, ddd, *J* 17.0, 10.0, 8.0 Hz, CH=CH<sub>2</sub> *trans*), 5.27 (2H, d, *J* 17.0 Hz, *trans* CH=CH<sub>2</sub> of *cis* and *trans*), 5.23 (1H, d, *J* 10.0 Hz, *cis* CH=CH<sub>2</sub> of *cis*), 5.20 (1H, d, *J* 15.0 Hz, CHHArMe of *cis*), 5.13 (1H, d, *J* 10.0 Hz *cis* CH=CH<sub>2</sub> *trans*), 5.05 (1H, d, *J* 15.0 Hz, CHHArMe *trans*), 4.03 (1H, d, *J* 9.0 Hz, CHTs of *cis*), 3.86 (1H, d, *J* 7.0 Hz, CHTs *trans*), 3.81 (1H, d, *J* 15.0 Hz, CHHArMe of *cis*), 3.77 (1H, d, *J* 15.0 Hz, CHHArMe *trans*), 3.59 (1H, ddd, *J* 8.0, 8.0, 8.0 Hz, CHCH=CH<sub>2</sub> of *cis*), 3.49 (1H, dd, *J* 8.0, 3.0 Hz, CH(CH<sub>3</sub>)<sub>2</sub> of *cis*), 3.40 (1H, ddd, *J* 7.0, 7.0, 7.0 Hz, CHCH=CH<sub>2</sub> *trans*), 3.19-3.17 (1H, m, CHiPr *trans*), 2.47 (3H, s, Me of Ts of *cis*), 2.45 (3H, s, Me of Ts *trans*), 2.34 (3H, s, Me of CH<sub>2</sub>ArMe of *cis*), 2.31 (3H, s, Me of CH<sub>2</sub>ArMe *trans*), 2.26-2.21 (1H, m, CH(CH<sub>3</sub>)<sub>2</sub> *trans*), 2.05 (1H, d quintet, *J* 7.0, 3.0 Hz CH(CH<sub>3</sub>)<sub>2</sub> of *cis*), 0.98 (3H, d, *J* 7.0 Hz, CH(CH<sub>3</sub>)<sub>2</sub> of 1), 0.90 (3H, d, *J* 7.0 Hz, CH(CH<sub>3</sub>)<sub>2</sub> *trans*), 0.88 (3H, d, *J* 7.0 Hz, CH(CH<sub>3</sub>)<sub>2</sub> *trans*), 0.86 (3H, d, *J* 7.0 Hz, CH(CH<sub>3</sub>)<sub>2</sub> of *cis*);  $\delta_{\text{C}}$  (100 MHz) 165.9 (C=O of *cis*), 165.4 (C=O *trans*), 145.1 (*ipso* Ts of *cis* and *trans*), 138.5 (CH=CH<sub>2</sub> *trans*), 137.6 (q Ar *trans*), 137.4 (q Ar of *cis*), 135.5 (q Ar *trans*), 134.8 (q Ar of *cis*), 134.0 (CH=CH<sub>2</sub> of *cis*), 132.2 (q Ar *trans*), 132.1 (q Ar of *cis*), 129.9 (*ortho* Ts of *cis* and *trans*), 129.6 (*meta* Ts of *cis* and *trans*), 129.4 (*ortho* CH<sub>2</sub>ArMe of *cis*), 129.5 (*ortho* CH<sub>2</sub>ArMe *trans*), 128.1 (*meta* CH<sub>2</sub>ArMe *trans*), 127.7 (*meta* CH<sub>2</sub>ArMe of *cis*), 119.8 (CH=CH<sub>2</sub> of *cis*), 117.8 (CH=CH<sub>2</sub> *trans*), 70.8 (CHTs *trans*), 69.7 (CHTs of *cis*), 63.6 (CHiPr of *cis*), 62.6 (CHiPr *trans*), 45.7 (CH<sub>2</sub>ArMe of *cis*), 44.5 (CH<sub>2</sub>ArMe *trans*), 42.7 (CHCH=CH<sub>2</sub>, of *cis*), 36.0 (CHCH=CH<sub>2</sub> *trans*), 29.2 (CH(CH<sub>3</sub>)<sub>2</sub> of *cis*), 28.2 (CH(CH<sub>3</sub>)<sub>2</sub> *trans*), 21.8 (Me of Ts of *cis* and *trans*), 21.1 (Me of CH<sub>2</sub>ArMe of *cis* and *trans*), 20.5 (CH(CH<sub>3</sub>)<sub>2</sub> of *cis*), 18.5 (CH(CH<sub>3</sub>)<sub>2</sub> *trans*), 17.5 (CH(CH<sub>3</sub>)<sub>2</sub> *trans*), 14.7 (CH(CH<sub>3</sub>)<sub>2</sub> of *cis*); *m/z* (CI) 429 [M+NH<sub>4</sub>]<sup>+</sup>, 412 [M+H]<sup>+</sup>, 255 [M-Ts]<sup>+</sup> (Found: [M+NH<sub>4</sub>]<sup>+</sup>, 412.1942. C<sub>24</sub>H<sub>29</sub>NO<sub>3</sub>S requires [M+NH<sub>4</sub>]<sup>+</sup>, 412.1940).

**(3S, 4R, 5S)-5-Isobutyl-1-(4-methylbenzyl)-3-(toluene-4-sulfonyl)-4-vinylpyrrolidin-2-one and (3R, 4S, 5S)-5-isobutyl-1-(4-methylbenzyl)-3-(toluene-4-sulfonyl)-4-vinylpyrrolidin-2-one (cis- and trans-8c)**

A solution of carbonate **7c** (45.0 mg,  $8.98 \times 10^{-2}$  mmol, 1.0 equiv) in MeCN (1 ml) was added to a flask charged with Pd<sub>2</sub>(dba)<sub>3</sub> (4.6 mg, 0.005 mmol, 5.0 mol%) and TTMPP (26.6 mg, 0.045 mmol, 0.5 equiv) at rt. After stirring for 12 h the reaction was concentrated under reduced pressure. Chromatography (50% EtOAc–petrol) gave a inseparable 90:10 mixture of *cis*- and *trans*-  $\gamma$ -lactams **8c** (33.0 mg, 85%) as a colourless oil;  $R_f$  0.40 (50% EtOAc–petrol);  $\nu_{\max}$  (film) 2926, 1697, 1448, 1304, 1149, 1086, 924, 812 cm<sup>-1</sup>;  $\delta_H$  (400 MHz) 7.87-7.82 (4H, m, *ortho* Ts of *cis* and *trans*), 7.37-7.35 (4H, m, *meta* Ts of *cis* and *trans*), 7.15-7.04 (8H, m, CH<sub>2</sub>ArMe of *cis* and *trans*), 5.72 (1H, dt, J 17.0, 10.0 Hz, CH=CH<sub>2</sub> of *cis*), 5.70-5.68 (1H, m, CH=CH<sub>2</sub> *trans*), 5.25 (1H, d, J 17.0 Hz, *trans* CH=CH<sub>2</sub> of *cis*), 5.22 (1H, d, J 11.0 Hz, *cis* CH=CH<sub>2</sub> of *cis*), 5.16 (1H, d, J 17.0 Hz, *trans* CH=CH<sub>2</sub> *trans*), 5.09 (1H, d, J 10.0 Hz *cis* CH=CH<sub>2</sub> *trans*), 4.94 (2H, d, J 15.0 Hz, CHHArMe of *cis* and *trans*), 3.97 (1H, d, J 15.0 Hz, CHHArMe of *cis*), 3.92 (1H, d, J 15.0 Hz, CHHArMe *trans*), 3.88-3.81 (3H, m, CHTs of *cis* and CHN of *cis* and *trans*), 3.66 (1H, dd, J 10.0, 6.5 Hz, CHCH=CH<sub>2</sub> of *cis*), 3.35-3.31 (1H, m, CHTs, *trans*), 3.22-3.18 (1H, m, CHCH=CH<sub>2</sub> *trans*), 2.46 (6H, s, Me of Ts of *cis* and *trans*), 2.34 (3H, s, Me of CH<sub>2</sub>ArMe of *cis*), 2.31 (3H, s, Me of CH<sub>2</sub>ArMe *trans*), 1.75-1.67 (1H, m, CH(CH<sub>3</sub>)<sub>2</sub> *trans*), 1.61-1.52 (3H, m, CH(CH<sub>3</sub>)<sub>2</sub> of *cis* and CH<sub>2</sub>*i*Pr *trans*), 1.33 (2H, dd, J 7.0, 7.0 Hz, CH<sub>2</sub>*i*Pr of *cis*), 0.94 (3H, d, J 7.0 Hz, CH(CH<sub>3</sub>)<sub>2</sub> *trans*), 0.80 (3H, d, J 7.0 Hz, CH(CH<sub>3</sub>)<sub>2</sub> of *cis*), 0.76 (3H, d, J 7.0 Hz, CH(CH<sub>3</sub>)<sub>2</sub> *trans*), 0.70 (3H, d, J 7.0 Hz, CH(CH<sub>3</sub>)<sub>2</sub> of *cis*);  $\delta_C$  (100 MHz)<sup>8</sup> 165.6 (C=O), 145.3 (*ipso* Ts), 137.2 (q Ar), 135.1 (q Ar), 133.6 (CH=CH<sub>2</sub>), 132.4 (q Ar), 129.6 (*meta* Ts), 129.3 (*ortho* Ts and CH<sub>2</sub>ArMe), 127.7 (CH<sub>2</sub>ArMe), 119.2 (CH=CH<sub>2</sub>), 71.5 (CHTs), 56.8 (CHN), 44.4 (CH<sub>2</sub>ArMe), 41.8 (CHCH=CH<sub>2</sub>), 36.9 (CH<sub>2</sub>*i*Pr), 23.8 (CH(CH<sub>3</sub>)<sub>2</sub>), 23.7 (CH(CH<sub>3</sub>)<sub>2</sub>), 21.8 (Me of Ts), 21.3 (CH(CH<sub>3</sub>)<sub>2</sub>), 21.1 (Me of CH<sub>2</sub>ArMe); *m/z* (CI) 443 [M+NH<sub>4</sub>]<sup>+</sup>, 426 [M+H]<sup>+</sup>, 279, 272 (Found: [M+NH<sub>4</sub>]<sup>+</sup>, 426.2109. C<sub>25</sub>H<sub>31</sub>NO<sub>3</sub>S requires [M+NH<sub>4</sub>]<sup>+</sup>, 426.2103)

**(3S, 4R, 5S)-5-Butyl-1-(4-methylbenzyl)-3-(toluene-4-sulfonyl)-4-vinylpyrrolidin-2-one and (3R, 4S, 5S)-5-butyl-1-(4-methylbenzyl)-3-(toluene-4-sulfonyl)-4-vinylpyrrolidin-2-one (cis- and trans-8d)**

A solution of carbonate **7d** (50.0 mg,  $99.8 \times 10^{-3}$  mmol, 1.0 equiv) in MeCN (1 ml) was added to a flask charged with Pd<sub>2</sub>(dba)<sub>3</sub> (4.61 mg,  $5.04 \times 10^{-3}$  mmol, 5.0 mol%) and TTMPP (23.4 mg,  $4.40 \times 10^{-2}$  mmol, 0.5 equiv) at rt. After stirring for 6 h the reaction was concentrated under reduced pressure. Chromatography (30% EtOAc–petrol) gave an inseparable 83:17 mixture of *cis*- and *trans*-  $\gamma$ -lactams **8d** (30mg, 79%) as a colourless oil;  $R_f$  0.46 (30% EtOAc–petrol);  $\nu_{\max}$  (film) 2929,

1697 (C=O), 1423, 1319 (SO<sub>2</sub>), 1149 (SO<sub>2</sub>), 1086, 812 cm<sup>-1</sup>; δ<sub>H</sub> (400 MHz) 7.85 (4H, d, J 8.0 Hz *ortho* Ts of *cis* and *trans*), 7.37 (4H, d, J 8.0 Hz, *meta* Ts of *cis* and *trans*), 7.19-7.04 (4H, m, *meta* CH<sub>2</sub>ArMe of *cis* and *trans*), 5.75 (1H, dt, J 17.0, 10.0 Hz, CH=CH<sub>2</sub> of *cis*), 5.70-5.66 (1H, m, CH=CH<sub>2</sub> *trans*), 5.28 (1H, d, J 17.0 Hz, *trans* CH=CH<sub>2</sub> of *cis*), 5.23 (1H, d, J 10.0 Hz, *cis* CH=CH<sub>2</sub> of *cis*), 5.19 (1H, d, J 17.0 Hz, *trans* CH=CH<sub>2</sub> *trans*), 5.12 (1H, d, J 10.0 Hz, *cis* CH=CH<sub>2</sub> *trans*), 4.95 (2H, d, J 15.0 Hz, CHHArMe of *cis*), 4.92 (2H, d, J 15.0 Hz, CHHArMe *trans*), 3.97 (2H, d, J 15.0 Hz, CHHArMe of *cis*), 3.91 (2H, d, J 15.0 Hz, CHHArMe *trans*), 3.79-3.74 (3H, m, CH<sub>n</sub>Bu of *cis* and CHTs of *cis* and *trans*), 3.66-3.65 (1H, m, CHCH=CH<sub>2</sub> of *cis*), 3.34-3.30 (1H, m, CHCH=CH<sub>2</sub> *trans*), 3.14-3.12 (1H, m, CH<sub>n</sub>Bu *min*), 2.45 (6H, s, Me of CH<sub>2</sub>ArMe of *cis* and *trans*), 2.33 (3H, s, Me of Ts of *cis*), 2.31 (3H, s, Me of Ts *trans*), 1.77-1.55 (2H, m, CH<sub>2</sub>(CH<sub>2</sub>)<sub>2</sub>CH<sub>3</sub> *trans*), 1.64-1.51 (2H, m, CH<sub>2</sub>(CH<sub>2</sub>)<sub>2</sub>CH<sub>3</sub> of *cis*), 1.34-1.04 (8H, m, CH<sub>2</sub>(CH<sub>2</sub>)<sub>2</sub>CH<sub>3</sub> of *cis* and *trans*), 0.87 (3H, t, J 7.0 Hz, CH<sub>2</sub>(CH<sub>2</sub>)<sub>2</sub>CH<sub>3</sub> *trans*), 0.81 (3H, t, J 7.0 Hz, CH<sub>2</sub>(CH<sub>2</sub>)<sub>2</sub>CH<sub>3</sub> of *cis*); δ<sub>C</sub> (75 MHz) 165.6 (C=O of *cis*), 164.8 (C=O *trans*), 145.2 (q Ar of *cis* and *trans*), 137.3 (CH=CH<sub>2</sub> *trans*), 135.1 (q Ar of *cis*), 135.0 (q Ar *trans*), 133.2 (CH=CH<sub>2</sub> of *cis*), 132.4 (q Ar of *cis* and *min*), 129.6 (*meta* Ts of *cis*), 129.5 (*meta* Ts *min*), 129.4 (q Ar of *cis* and *trans*), 129.3 (*ortho* Ts and ArMe of *cis* and *trans*) 128.0 (ArMe *trans*) 127.6 (ArMe of *cis*), 119.5 (CH=CH<sub>2</sub> of *cis*), 117.5 (CH=CH<sub>2</sub> *trans*), 71.3 (CHTs of *cis*), 71.1 (CHTs *trans*), 60.1 (CH<sub>n</sub>Bu *trans*), 58.4 (CH<sub>n</sub>Bu of *cis*), 44.6 (CH<sub>2</sub>ArMe *trans*), 44.4 (CH<sub>2</sub>ArMe of *cis*), 41.6 (CHCH=CH<sub>2</sub> of *cis*) 41.0 (CHCH=CH<sub>2</sub> *trans*), 31.2 (CH<sub>2</sub>(CH<sub>2</sub>)<sub>2</sub>CH<sub>3</sub> *trans*), 29.7 (CH<sub>2</sub>CH<sub>2</sub>CH<sub>2</sub>CH<sub>3</sub> *trans*), 27.7 (CH<sub>2</sub>(CH<sub>2</sub>)<sub>2</sub>CH<sub>3</sub> of *cis*), 26.4 (CH<sub>2</sub>CH<sub>2</sub>CH<sub>2</sub>CH<sub>3</sub> of *cis*), 26.1 ((CH<sub>2</sub>)<sub>2</sub>CH<sub>2</sub>CH<sub>3</sub> *trans*), 22.5 ((CH<sub>2</sub>)<sub>2</sub>CH<sub>2</sub>CH<sub>3</sub> of *cis*), 21.8 (Me of Ts of *cis* and *trans*), 21.1 (Me of CH<sub>2</sub>ArMe of *cis* and *trans*), 13.9 (Me of *n*Bu *trans*), 13.8 (Me of *n*Bu of *cis*); *m/z* (CI) 443 [M+NH<sub>4</sub>]<sup>+</sup>, 426 [M+H]<sup>+</sup>, 272 (Found: [M+NH<sub>4</sub>]<sup>+</sup>, 426.2106. C<sub>25</sub>H<sub>31</sub>NO<sub>3</sub>S requires [M+NH<sub>4</sub>]<sup>+</sup>, 426.2103)

**(+)-(3*S*, 4*S*, 5*R*)-5-(4-Methoxybenzyl)-1-(4-methylbenzyl)-3-(3-methylbut-2-enyl)-3-(toluene-4-sulfonyl)-4-vinylpyrrolidin-2-one (10)**

A solution of lactams *cis*-1 and *trans*-1 (5.6:1 mixture; 332 mg, 0.680 mmol, 1.0 equiv) in DMF (5 ml) was added to KH (94.0 mg of a 35% wt dispersion in mineral oil washed with pentane, 0.820 mmol, 1.2 equiv) at 0 °C under argon. After 15 min prenyl bromide (780 μl, 6.80 mmol, 10 equiv) was added and the mixture warmed to rt. After 20 min the reaction was quenched by dropwise addition of MeOH until the solution decolourised. Saturated aqueous NH<sub>4</sub>Cl (5 ml) was then added and the mixture extracted with EtOAc (5 x 10 ml). The combined organic extracts were dried (MgSO<sub>4</sub>) and concentrated under reduced pressure. Chromatography (20% EtOAc–petrol) gave the lactam **10** (265 mg, 70%; 83% from *cis*-1) as a colourless oil; *R<sub>f</sub>* 0.60 (30% EtOAc–petrol); [α]<sub>D</sub><sup>24</sup> +72.0 (*c* 0.5, CHCl<sub>3</sub>); ν<sub>max</sub> (film) 1691, 1512, 1441, 1315, 1248, 1140 cm<sup>-1</sup>; δ<sub>H</sub> (400 MHz) 7.72 (2H,

d, J 8.0 Hz, *ortho* Ts), 7.28 (2H, d, J 8.0 Hz, *meta* Ts), 7.06 (2H, d, J 8.5 Hz, *ortho* CH<sub>2</sub>ArMe), 6.92 (2H, d, J 8.0 Hz, *ortho* ArOMe), 6.80 (2H, d, J 8.5 Hz, *meta* CH<sub>2</sub>ArMe), 6.60 (2H, d, J 8.0 Hz, *meta* ArOMe), 6.50 (1H, dt, J, 17.0, 10.0, Hz, CH=CH<sub>2</sub>), 5.18 (1H, dd, J 10.0, 2.0 Hz, *trans* CH=CH<sub>2</sub>), 5.00 (1H, dd, J 17.0, 2.0 Hz, *cis* CH=CH<sub>2</sub>), 4.92 (1H, d, J 15.0 Hz, NCHH), 4.72 (1H, m, CH=C(Me)<sub>2</sub>), 3.76 (3H, s, OMe of ArOMe), 3.59 (1H, ddd, J 9.0, 9.0, 5.0 Hz, CHN), 3.39 (1H, dd, J 14.0, 9.0 Hz, CHHArOMe), 3.22 (1H, m, CHCH=CH<sub>2</sub>), 3.20 (1H, d, J 15.0 Hz, NCHH), 3.11 (1H, dd, J 14.0, 5.0 Hz, CHHArOMe), 2.69 (1H, dd, J 14.0, 11.0 Hz, CHHCH=C(CH<sub>3</sub>)<sub>2</sub>), 2.44-2.41 (1H, m, CHHCH=C(CH<sub>3</sub>)<sub>2</sub>), 2.38 (3H, s, Me of Ts), 2.21 (3H, s, Me of CH<sub>2</sub>ArMe), 1.58 (3H, s, CH<sub>2</sub>CH=C(CH<sub>3</sub>)<sub>2</sub>) 1.54 (3H, s, CH<sub>2</sub>CH=C(Me)<sub>2</sub>); δ<sub>C</sub> (100 MHz); 167.7 (C=O), [158.3, 145.1 (q Ar)], 137.7 (C(CH<sub>3</sub>)<sub>2</sub>), [137.2, 133.9, 133.0 (q Ar)], 132.7 (CH=CH<sub>2</sub>), 131.7 (q Ar), 131.1 (*ortho* Ts), 130.4 (*ortho* CH<sub>2</sub>ArMe), 129.1 (*meta* Ts), 128.9 (*meta* ArOMe), 128.3 (*ortho* ArOMe), 120.1 (CH=CH<sub>2</sub>), 117.1 (CH=C(Me)<sub>2</sub>), 114.0 (*meta* CH<sub>2</sub>ArMe), 75.8 (CTs), 59.8 (CHN), 55.3 (OMe of CH<sub>2</sub>ArOMe), 47.7 (CHCH=CH<sub>2</sub>), 45.7 (CH<sub>2</sub>ArMe), 36.4 (CH<sub>2</sub>ArOMe), 31.2 (CH<sub>2</sub>CH=C(Me)<sub>2</sub>), 25.9 (CH<sub>2</sub>CH=C(CH<sub>3</sub>)<sub>2</sub>), 21.8 (Me of Ts), 21.1 (Me of CH<sub>2</sub>ArMe), 18.4 (CH<sub>2</sub>CH=C(CH<sub>3</sub>)<sub>2</sub>); *m/z* (CI) 558 [M+H]<sup>+</sup>, 410, 404, 376, 174 (Found: [M+H]<sup>+</sup>, 558.2682. C<sub>34</sub>H<sub>39</sub>NO<sub>4</sub>S requires [M+H]<sup>+</sup>, 558.2678) (Found: C, 73.03; H, 6.78; N, 2.50. C<sub>33</sub>H<sub>39</sub>NO<sub>5</sub>S requires C, 73.22; H, 7.05; N, 2.51%).

## References

- <sup>1</sup> J. J. Caldwell, D. Craig, and S. P. East, *Synlett*, 2001, 1602.
- <sup>2</sup> Wang, J.; Hou, Y.; *J. Chem. Soc. Perkin Trans. 1* 1998, **12**, 1919.
- <sup>3</sup> Kozikowski, Alan. P.; Ma, D.; Pang, Y. P.; Shum, P.; Likic, V. *J. Amer. Chem. Soc.* **1993**, *115*, 3957.
- <sup>4</sup> McChesney, E. W.; Swann, W. K. *J. Am. Chem. Soc.* **1937**, *59*, 1116.
- <sup>5</sup> Burgess, K.; Liu, L. T.; Pal, B. *J. Org. Chem.* **1993**, *58*, 4758.
- <sup>6</sup> Bergmeier, S. C.; Seth, P. P. *J. Org. Chem.* **1997**, *62*, 2671.
- <sup>7</sup> (a) Berry, M. B. *Ph.D Thesis, Imperial College*, **1993** (b) Hoppe, I.; Hoffmann, H.; Gaertner, I.; Krettek, T.; Hoppe, D. *Synthesis* **1991**, *12*, 1157.
- <sup>8</sup> Data given for major, *cis*- diastereomer. <sup>13</sup>C Data for minor, *trans*- diastereoisomer are not listed due to low intensity.
